# 1 Slow changes in seizure pathways in individual patients with focal epilepsy

2

3 Gabrielle M Schroeder<sup>1</sup>, Beate Diehl<sup>2</sup>, Fahmida A Chowdhury<sup>2</sup>, John S Duncan<sup>2</sup>, Jane de Tisi<sup>2</sup>,

4 Andrew J Trevelyan<sup>3</sup>, Rob Forsyth<sup>3</sup>, Andrew Jackson<sup>3</sup>, Peter N Taylor<sup>1,2,3</sup>, Yujiang Wang<sup>1,2,3</sup>

5

6 1. Interdisciplinary Computing and Complex BioSystems Group, School of Computing  
7 Science, Newcastle University, UK

8 2. UCL Queen Square Institute of Neurology, Queen Square, London WC1N 3BG, UK

9 3. Institute of Neuroscience, Faculty of Medical Science, Newcastle University, UK

10

11

## 12 Abstract

13

14 Personalised medicine requires that treatments adapt to not only the patient, but changing factors  
15 within each individual. In focal epilepsy, brain dynamics change over time and modulate  
16 pathological processes; however, surprisingly little is known about whether and how seizures vary  
17 in the same patient. We quantitatively compared within-subject seizure network dynamics using  
18 intracranial recordings of ~700 seizures from 31 patients with focal epilepsy (mean 16.5  
19 seizures/subject) and three canines with focal-onset seizures (mean 62.3 seizures/subject). In all  
20 subjects, we found variability in seizure paths through the space of possible network dynamics,  
21 producing either a spectrum or clusters of different dynamics. Seizures with similar pathways  
22 tended to occur closer together in time, independent of whether antiepileptic medication reduction  
23 occurred, but did not necessarily have similar durations or circadian profiles. Our results suggest  
24 that slow modulatory processes shape within-subject seizure dynamics, leading to variable seizure  
25 pathways that may require tailored treatment approaches.

26 Focal epilepsy is characterised by spontaneous, recurrent seizures that arise from localised cortical  
27 sites<sup>1</sup>. An unresolved question is how much seizure dynamics can vary in individual patients. Past  
28 studies suggest that seizures within a single patient share common features<sup>2-6</sup> and progress through  
29 a similar sequence<sup>7</sup>, or “characteristic pathway<sup>8</sup>,” of neural dynamics. However, there is also  
30 evidence that seizure dynamics vary in some patients. Clinically, there may be different types of  
31 seizure dynamics in patients with multiple seizure onset sites<sup>9</sup>, and long-term  
32 electroencephalographic (EEG) recordings suggest that a subset of patients have multiple seizure  
33 populations with distinct dynamics<sup>8,10-12</sup>. Ictal onset patterns<sup>13,14</sup>, the extent of seizure spread<sup>15,16</sup>,  
34 and seizure recruitment patterns<sup>17</sup> can also differ in the same subject. This variability may arise  
35 from fluctuations in the underlying brain state<sup>18-22</sup>, suggesting that background neural dynamics  
36 affect not only seizure likelihood<sup>19,23</sup>, but also seizure *features*. Crucially, a given treatment may only  
37 address a subset of a patient’s seizure dynamics: for example, a single neurostimulation protocol  
38 may not control the complete repertoire of seizures<sup>18</sup> and a single prediction algorithm may fail to  
39 forecast all seizures<sup>10,24,25</sup>. Consequently, seizure variability has important implications for clinical  
40 management in these patients.

41  
42 To design optimal and comprehensive treatments, we therefore need to understand the prevalence  
43 and characteristics of within-subject seizure variability. Is seizure variability present in all patients,  
44 and, if so, what form does the variability take? Do within-subject seizures cluster into groups with  
45 distinct dynamics? Can other seizure features, such as duration, distinguish different seizure  
46 populations<sup>8,10,24</sup>? How are different seizure dynamics distributed in time?

47  
48 To answer these questions, we need to objectively quantify seizure similarity. This task is  
49 challenging due to the complexity of seizure dynamics: a variety of spatiotemporal features change  
50 independently during seizure evolution. Although some studies have quantitatively compared  
51 within-subject seizures<sup>26-31</sup>, the current gold standard remains visual inspection of ictal EEG by  
52 trained clinicians. This latter approach is time-consuming and subjective, and can miss important  
53 features, including functional network interactions, that are difficult to detect visually. These  
54 functional network dynamics, also known as functional connectivity patterns, describe  
55 relationships between the activity recorded by different EEG channels. Temporal changes in  
56 network dynamics play important roles in seizure initiation, propagation, and termination<sup>2,22,32-41</sup>,  
57 in part due to dynamic changes in the connectivity of the seizure onset zone<sup>7,42-44</sup>. To fully  
58 understand how functional interactions support ictal processes, we must also determine if multiple  
59 seizure pathways can co-exist in the neural connectivity space of an individual patient. Such

60 diversity would reveal that the same neural regions can variably interact to produce a variety of  
61 pathological dynamics.

62

63 Our goal was to quantify and characterise within-subject variability in seizure pathways through  
64 network space. We visualised and compared the within-subject seizure network evolutions of  
65 human patients with focal epilepsy (recorded for 43-382 hrs) and canine subjects with focal-onset  
66 seizures (recorded for 45-475 days). In total, we analysed the network evolutions of 698 seizures  
67 (average 16.5 seizures/human subject, 62.3 seizures/canine subject), making our study the first  
68 large-scale examination of within-subject seizure variability. In both human and canine recordings,  
69 we found variability in seizure network evolution, revealing that within-subject seizures are not  
70 well-represented by a single characteristic pathway. However, seizures can also share parts or all  
71 of the same pathway, with recurring dynamical elements across seizures. Furthermore, we related  
72 variability in seizure network dynamics to seizure duration and the temporal relationships between  
73 seizures, providing novel insight into the characteristics of within-subject seizure variability. Our  
74 analysis revealed that more similar seizures tend to occur closer together in time in most subjects,  
75 suggesting that slow modulatory processes shape seizure pathways.

76

77

## 78 **Results**

79

80 We analysed seizure network evolution in 31 human subjects (511 seizures total, mean 16.5  
81 seizures/subject) with focal epilepsy who underwent continuous intracranial  
82 electroencephalographic (iEEG) recordings as part of presurgical evaluation. Additionally, we  
83 analysed seizures from three canine subjects (187 seizures total, mean 62.3 seizures/subject) with  
84 naturally occurring epilepsy and focal-onset seizures that underwent chronic (45-475 days) iEEG  
85 recordings as part of a seizure prediction study<sup>12,45</sup>. Subject details are provided in Supplementary  
86 Tables S1.1 and S1.2.

87

88 We first discuss how we visualise seizure network dynamics and quantify the dissimilarity of  
89 within-subject seizure pathways through network space. Importantly, differences in seizure  
90 network dynamics do not necessarily correspond to anatomical differences in the location and  
91 spread of seizure activity; rather, our analysis captures differences in the neural *interactions* that  
92 shape ictal processes. We then illustrate key features of this variability using two example subjects  
93 and summarise our findings across the entire cohort.

94

## 95 **Visualisation and comparison of within-subject seizure network dynamics**

96

97 We demonstrate our analysis using seven seizures from an example human subject, P1 (for full  
98 analysis details, see Methods). From the iEEG recordings of each seizure (Fig. 1a), we computed  
99 the sliding-window functional connectivity, defined as band-averaged coherence in six frequency  
100 bands (Fig. 1b). Thus, each seizure time window was described by a set of six connectivity matrices  
101 that captured interactions between iEEG channels across different frequencies. The set of all  
102 possible connectivity patterns creates a high dimensional space, in which each location  
103 corresponds to a specific network configuration. As such, each time window was represented by  
104 a high-dimensional point, and the evolution of a seizure's network dynamics formed a pathway in  
105 this connectivity space. In summary, rather than comparing the seizure iEEG traces, we first  
106 transformed the seizures into a network space, thus framing our comparison of seizure dynamics  
107 as a comparison of seizure pathways through this feature space.

108

109 To visualise seizure pathways through network space, we extracted recurring patterns of seizure  
110 connectivity using a dimensionality reduction technique<sup>46,47</sup> (Fig. 1c). Each point in a seizure  
111 pathway was thus described as a weighted combination of connectivity “building blocks,” each of  
112 which corresponded to a specific, recurring seizure network pattern. In our data, at a given time  
113 point, a single network pattern often contributed to the majority of the observed seizure  
114 connectivity. Therefore, we assigned each time point to the dominant network pattern, resulting  
115 in series of network states that provided a simplified description and visualisation of the seizure  
116 pathway (see Methods) (Fig. 1d).

117

118 In subject P1, we observed four main pathways of network state progressions (Fig. 1d). For the  
119 most part, comparing seizures based on these state progressions agreed with our visual impressions  
120 of the iEEG traces. However, seemingly similar iEEG traces can be associated with different  
121 network structures. This point is illustrated by seizures 1-3: although their dominant ictal activity  
122 was in the same spatial location, seizure three was distinguished by a different network state,  
123 revealing differing underlying patterns of brain interactions. Meanwhile, iEEG traces with  
124 different features can share a common network progression pattern. For example, despite  
125 amplitude differences in the ictal discharges, the initial progressions of seizures 4-7 was described  
126 by the same state (state 5, green), indicating that a common pattern of brain interactions underlay

127 early seizure spread in all four seizures. Therefore, these network characterisations of dynamics  
128 can reveal hidden seizure features that are not visually accessible in the iEEG traces.

129

130 While the state progressions helped visualise differences in seizure pathways, we still lacked an  
131 objective quantification of seizure dissimilarity. An ideal measure must compare seizure pathways  
132 across three different scenarios, which are all illustrated by subject P1's seizures:

133 1) Two seizures can progress along the same pathway, but potentially at different rates (e.g.,  
134 subject P1 seizures 4 and 5).

135 2) Two seizures can progress along completely distinct pathways (e.g., subject P1 seizures 4  
136 and 3).

137 3) Two seizures can share portions of the same pathway, but have divergent dynamics during  
138 other parts of the seizures (e.g., subject P1 seizures 4 and 7).

139

140 We therefore created a measure that recognises similarities in seizure pathways, despite differences  
141 in the rates of seizure evolution. After computing a noise-reduced version of the seizure functional  
142 connectivity, we applied dynamic time warping<sup>48</sup> to each pair of seizure functional connectivity  
143 time courses. Dynamic time warping nonlinearly stretches each time series such that similar points  
144 are aligned, thus minimizing the total distance between the two time series. We then defined the  
145 "dissimilarity" between two seizures as the average difference between the seizure pathways across  
146 all warped time points. Crucially, the warping step ensured that seizures following the same  
147 pathway (scenario 1) had a low dissimilarity, regardless of their rates of progression. If two seizures  
148 had completely non-overlapping pathways (scenario 2), their dissimilarity would depend on the  
149 average distance of the seizures in network space. Finally, if seizures shared part of the same  
150 pathway (scenario 3), their dissimilarity was determined by the relative duration of the shared  
151 pathway and the distance of the divergent sections of the pathways.

152

153 Fig. 1e shows subject P1's seizure dissimilarity matrix, which contains the seizure dissimilarities of  
154 all pairs of the subject's seizures. In this subject, the visual agreement between the seizure  
155 dissimilarity matrix, the seizure iEEG traces, and the seizure state progressions was striking. Due  
156 to their similar pathways, there was a low dissimilarity between seizures 1 and 2, as well as between  
157 seizures 4, 5, and 6. Seizure 3 was relatively different from seizures 1 and 2, indicating that their  
158 network states occupied distant regions of network space, despite the similarities in their iEEG  
159 traces. The seizure dissimilarity matrix also provides a more detailed comparison of seizure  
160 dynamics than the simplified state progression representation alone. For example, although

161 seizures 4-6 all had similar state progressions, seizures 5 and 6 were more similar to each other  
162 than to seizure 4 due to subtle network differences that were not captured by the state progression  
163 visualisations of the seizure pathways (Supplementary Fig. S2.3).

164

165 Therefore, for each subject, the network state progressions provide a simplified description for  
166 visualising the seizure network dynamics, while the seizure dissimilarity matrix gives a precise and  
167 objective comparison of each pair of seizure pathways. Importantly, both seizure dissimilarity  
168 matrices and network state progressions are subject-specific: due to differences in the iEEG  
169 implantation, seizure dissimilarities and network states cannot be readily compared across subjects.  
170 Throughout the rest of the results, we will focus on the within-subject seizure dynamics of two  
171 example subjects, P2 and P3, that highlight important features of within-subject seizure variability,  
172 while also summarising findings across the entire cohort. Fig. 2 shows a selection of the example  
173 subjects' ictal iEEG traces and the corresponding network state progressions as a reference for  
174 the downstream analysis. The seizure variability analysis of all subjects is available on Zenodo  
175 (<http://dx.doi.org/10.5281/zenodo.3240102>) and summarised in Supplementary Table 9.

176

### 177 **Seizure dissimilarity matrices quantify differences in within-subject seizure pathways** 178 **through network space**

179

180 As in subject P1, the seizure dissimilarity matrices and state progressions revealed variability in  
181 seizure pathways in subjects P2 and P3 (Fig. 3a and c). Notably, within each subject there were  
182 commonalities in state progressions across seizures, suggesting that seizure dynamics were  
183 constrained to certain pathways through network space. However, seizure progression was not  
184 always deterministic: in some cases, the same state could lead to seizure termination or further  
185 progression along one or more pathways (e.g., subject P2, state 4). A similar flexibility in seizure  
186 pathways was observed across subjects.

187

188 The seizure dissimilarity matrices quantified these observed differences in the seizure pathways.  
189 As expected from the state progressions, there were groups of seizures with similar network  
190 progressions and near-zero inter-seizure dissimilarities (e.g., P2 seizures 6-8, P3 seizures 2-4).  
191 However, each seizure dissimilarity matrix also revealed lower levels of similarity, such as between  
192 seizures 2 and 3 in subject P2, that would be difficult to establish solely from the iEEG traces or  
193 state progressions.

194

195 We also examined the distribution of seizure dissimilarities in each subject. Strikingly, the seizure  
196 dissimilarities in subject P3 (Fig. 3d) had a bimodal distribution, indicating that most pairs of  
197 seizures had either relatively similar or different network dynamics, with few intermediate levels  
198 of similarity. Meanwhile, subject P2 (Fig. 3b) had a wide range of dissimilarities, suggesting that  
199 there were varying degrees of similarity between pairs of seizures in this subject. These different  
200 distributions of seizure dissimilarities revealed that seizure variability manifests in different ways  
201 across subjects.

202

### 203 **Seizures cluster into groups or form a spectrum based on their network dynamics**

204

205 Given that the distribution of seizure dissimilarities varied across subjects, we asked if within-  
206 subject seizures cluster into groups with characteristic network dynamics. Since many subjects,  
207 including P2, had intermediate levels of seizure dissimilarity, we first hierarchically clustered each  
208 subject's seizures based on their seizure dissimilarity matrix. Rather than assigning seizures to  
209 separate groups with different dynamics, the hierarchical clustering described different levels of  
210 similarity between seizures. Therefore, to determine if we could group seizures based on their  
211 dynamics, we additionally found the optimal number of flat (i.e., non-hierarchical) clusters using  
212 the gap statistic, which compares the observed clusters to reference clusters<sup>49</sup> (see Methods).  
213 Crucially, the reference distributions also allowed us to test for the absence of multiple seizure  
214 clusters. A single seizure cluster in a subject would indicate that 1) all seizures follow the same  
215 pathway, forming a single group of seizures with little variability between seizures, or 2) that the  
216 seizures form a spectrum of dynamics that is best described by hierarchical relationships, rather  
217 than distinct groups of seizures.

218

219 The resulting clusters for subjects P2 and P3 are shown in Fig. 4a-b. Although subject P2 had  
220 groups of seizures with similar dynamics, the varying levels of similarity between other pairs of  
221 seizures meant that there was no optimal way to split these seizures into separate clusters. Instead,  
222 the seizures created a spectrum of network dynamics. Meanwhile, the optimal clustering for subject  
223 P3 was three seizure clusters, shown in different colours on the dendrogram in Fig. 4b.

224

225 Fig. 4c shows the number of seizure clusters across all subjects. The majority of subjects (22  
226 subjects, including 2 canines) had one seizure cluster (i.e., no clear groupings of seizures), 11  
227 subjects (1 canine) had two clusters, and one subject had three clusters. We then examined the  
228 distribution of mean seizure dissimilarities in subjects with and without multiple seizure clusters



229 (Fig. 4d). Although seizure dissimilarities must be compared cautiously across subjects, the mean  
230 seizure dissimilarity nonetheless indicates the amount of seizure variability in each subject. We saw  
231 a wide range in variability levels in subjects with a single seizure cluster (top histogram): while some  
232 had a low average dissimilarity, suggesting that most seizures progress along a similar pathway,  
233 others had higher levels of variability, indicating a spectrum of dynamics. However, some seizure  
234 variability was present in all subjects, and there was no clear cut-off to distinguish subjects with  
235 low and high levels of variability. In subjects with multiple seizure clusters, we observed that there  
236 could be variability *within* a seizure cluster (middle histogram), as well as relatively low dissimilarity  
237 *between* different seizure clusters (bottom histogram). Thus, the number of seizure clusters does  
238 not indicate the level of seizure variability in a given subject, but rather the form of the variability  
239 (spectrum vs. clusters).

240

#### 241 **Differences in seizure temporal duration do not necessarily correspond to differences in** 242 **seizure network dynamics**

243

244 Past studies have suggested that seizures with different pathways may be differentiated by their  
245 duration; for example, a bimodal distribution of seizure duration would indicate two  
246 corresponding groups of seizures with distinct evolutions<sup>8,10,24</sup>. To determine if there is an  
247 association between seizure dissimilarities and differences in seizure duration, we created a  
248 “duration distance” matrix in each subject that captured the absolute difference in temporal  
249 duration between each pair of seizures (Fig. 5b and f) (Methods). In subject P2, the differences  
250 between the seizure dissimilarity and duration distance matrices were visually apparent, and there  
251 was no association between them (Spearman’s  $\rho = -0.02$ ,  $p = 0.4866$ , one-tailed Mantel test) (Fig.  
252 5a-d). Subject P3, however, had seizure dissimilarity and duration distance matrices with similar  
253 structures, and these measures were significantly correlated (Spearman’s  $\rho = 0.69$ ,  $p = 0.0003$ , one-  
254 tailed Mantel test) (Fig. 5e-h).

255

256 Across subjects (Fig. 5i), Spearman’s correlation between seizure dissimilarities and duration  
257 distances ranged from -0.29 to 0.86 (mean: 0.33) and was significant in eighteen subjects (52.9%)  
258 after global correction for multiple comparisons. In the remaining subjects, there were two  
259 possible scenarios that could lower the association between seizure dissimilarity and duration  
260 distance: seizures with the same duration could have different network dynamics, or seizures with  
261 different durations could have similar network dynamics. Subject P2’s seizures demonstrated both  
262 of these cases.



263

264 We also investigated if the correlation between seizure dissimilarities and duration distances was  
265 stronger in subjects that had a clear delineation between short and long seizures (Supplementary  
266 S4). However, the existence of clusters in seizure duration was neither necessary nor sufficient for  
267 1) a significant association between seizure dissimilarities and duration distances, or 2) the  
268 existence of clusters based on seizure dynamics. As such, seizure duration clusters should be  
269 interpreted cautiously, as they may not be associated with differences in seizure pathways.

270

### 271 **Seizures with more similar network dynamics tend to occur closer together in time**

272

273 Many time-varying factors, such as sleep<sup>21,23,50–52</sup> and hormones<sup>53–56</sup>, are thought to influence seizure  
274 likelihood and dynamics. Additionally, during presurgical monitoring, antiepileptic medication is  
275 reduced in many patients, impacting brain dynamics<sup>57</sup>. We therefore explored how seizure  
276 variability was distributed in time in each subject. Fig. 6 shows the amount of time elapsed between  
277 the seizures of subjects P2 and P3. In both subjects, we saw a shift in the seizure pathways over  
278 time. Notably, although subject P3's seizures could be divided into groups based on network  
279 dynamics, those seizures were not clustered together in time; instead, there were relatively  
280 consistent interictal intervals.

281

282 Due to the observed temporal changes in seizure dynamics, we first asked if seizures that occur  
283 closer together in time tend to have more similar network dynamics. For each subject, we defined  
284 the “temporal distance matrix” as the amount of time elapsed between the onsets of each pair of  
285 seizures (Fig. 7b and f). In subject P2, more similar seizures tended to cluster together in time,  
286 resulting in a significant correlation between seizure dissimilarities and temporal distances  
287 (Spearman's  $\rho = 0.69$ ,  $p = 0.001$ , one-tailed Mantel test) (Fig. 7 a-d). Meanwhile, subject P3 lacked  
288 temporal clusters of similar seizures, and the correlation between seizure dissimilarities and  
289 temporal distances was not significant (Spearman's  $\rho = 0.24$ ,  $p = 0.0527$ , one-tailed Mantel test)  
290 (Fig. 7 e-h).

291

292 Fig. 7i summarises the relationship between seizure dissimilarities and temporal distances across  
293 all subjects. In almost all subjects, there was a positive Spearman's correlation between seizure  
294 dissimilarities and temporal distances (range: -0.10 – 0.83, mean: 0.45). This association was  
295 significant in 24 subjects (71.0%), including all three canine subjects, demonstrating that the  
296 temporal association between similar seizures also exists on longer time-scales. We also explored

297 whether antiepileptic medication tapering during the presurgical recording was associated with a  
298 stronger relationship between seizure dissimilarities and temporal distances (Supplementary S5).  
299 Interestingly, there was no association between whether medication tapering was performed and  
300 whether the correlation between seizure dissimilarities and temporal distances was significant ( $\chi^2$   
301 test,  $p = 0.96$ ), suggesting that other temporal factors also influence seizure dynamics.

302

303 Since circadian rhythms influence seizure dynamics in some patients<sup>21,23,50–52</sup>, for each subject we  
304 also created a “circadian distance matrix” that captured the difference in the time-of-day of the  
305 seizures. Only five subjects (14.7%) had significant associations between seizure dissimilarities and  
306 circadian distances, indicating that in most subjects, seizure dynamics change on longer time-scales  
307 than circadian rhythms (Supplementary S6).

308

309 Additionally, we explored if the relationships between seizure dissimilarity and these other seizure  
310 features (duration distance, temporal distance, and circadian distance) were highly dependent on  
311 the approach used to quantify seizure dissimilarity through network space. Using two alternative  
312 measures, we found qualitatively similar results at both the cohort and individual level  
313 (Supplementary S10), indicating that the observed associations were robust.

314

### 315 **Relationship between seizure variability and clinical factors**

316

317 Finally, we related seizure variability to clinical factors, including the seizure clinical type, patient  
318 surgical outcome, and the pathology of the resected brain tissue. We found that the observed  
319 seizure variability was poorly explained by differences in the coarse categorisation of seizure  
320 clinical type (subclinical, focal, or secondarily generalised) in most subjects (Supplementary S7). In  
321 other words, the observed variability cannot be solely attributed to differences in the symptoms  
322 or extent of spread (as defined by the clinical classification) of the seizures. This finding was  
323 expected given that seizures of different clinical types can share similar dynamics, while seizures  
324 of the same clinical type can have dramatically different features.

325

326 We found no association between postsurgical seizure freedom and a number of measures of  
327 seizure variability, including the number of seizure clusters, the average seizure dissimilarity, and  
328 the number of onset network states (Supplementary S8). These results suggest that the level or  
329 form of seizure variability does not impact seizure freedom following surgical resection, perhaps  
330 because these measures do not capture the extent or location(s) of the tissue responsible for

331 generating seizures. Likewise, higher levels of seizure variability were not associated with a  
332 particular seizure onset site (Supplementary S8). These findings demonstrate that seizure variability  
333 is widely present and suggest that slow temporal factors may be more crucial for determining the  
334 extent and form of the variability.

335

336

## 337 **Discussion**

338

339 We have quantified variability in seizure network dynamics within individual human patients with  
340 focal epilepsy, revealing that within-subject seizures are neither deterministic nor comprehensively  
341 represented by a single dynamical pathway. Notably, however, in each subject we also observe  
342 groups of seizures with shared dynamics, suggesting that seizures are constrained to a subspace of  
343 potential brain dynamics. We also find within-subject seizure variability in chronic recordings of  
344 three canines, demonstrating that seizure dynamics also vary on longer time-scales. Interestingly,  
345 seizure network dynamics change over time in most subjects, with more similar seizures tending  
346 to occur closer together in time, suggesting that slow-changing factors modulate within-subject  
347 seizure dynamics.

348

349 We investigated variability in seizure functional network evolution due to the importance of  
350 network interactions in ictal processes<sup>2,7,22,32,34-44</sup> and build on previous work by demonstrating  
351 within-subject variability in these pathological network dynamics. However, the framework we  
352 present could easily be adapted to compare other features that highlight different aspects of seizure  
353 dynamics. For example, a univariate feature that captures the amplitude and frequency of ictal  
354 discharges may be better suited for comparing the involvement of different channels, similar to  
355 how clinicians visually compare EEG traces. Meanwhile, comparisons of parameter time courses,  
356 derived using model inversion<sup>8,58,59</sup>, could reveal different patterns of changes in the neural  
357 parameters underlying a patient's seizures. Finally, due to subject-specific recording layouts, we  
358 focused on comparing seizure dynamics within individual subjects. However, seizures could also  
359 be compared across patients to uncover common classes of pathological dynamics<sup>8,60</sup>.

360

361 To quantify within-subject variability in seizure network evolution, we developed a “seizure  
362 dissimilarity” measure that addresses the challenges of comparing diverse spatiotemporal patterns  
363 across seizures. A few previous studies have attempted to quantitatively compare seizure dynamics  
364 using either univariate<sup>27,28,30,31</sup> or network<sup>26,29</sup> features computed from scalp or intracranial EEG.

365 These earlier dissimilarity measures were based on edit distance, which captures how many  
366 replacements, insertions, and deletions are required to transform one sequence into another.  
367 Importantly, the insertion cost increases the dissimilarity of similar seizures with different rates of  
368 progression. Although previous work suggested lowering seizure dissimilarity in such scenarios<sup>31</sup>,  
369 to our knowledge, our dynamic time warping approach provides the first measure of seizure  
370 dissimilarity that does not penalise temporal variability between otherwise similar seizures. Despite  
371 this difference, these past studies also reported both common and disparate dynamics across  
372 within-subject seizures; however, this work was limited to a small number of patients and/or  
373 seizures per patient. Our work provides novel insight into the prevalence and characteristics of  
374 seizure variability by analysing almost 700 seizures across thirty-four subjects. Finally, we expand  
375 on previous work by using seizure dissimilarity for downstream analysis, including clustering  
376 seizures and quantifying the relationship between seizure dynamics and other features.

377

378 Previous work has found that within-subject seizures have similar dynamics<sup>2-8</sup>, although variability  
379 may be introduced through different rates of progression<sup>4,61</sup> or early termination in the seizure  
380 pathway<sup>6,8</sup>. In our cohort, we observed that subsets of within-subject seizures follow approximately  
381 the same dynamical pathway through network space, and such similar groups of seizures likely  
382 underlie these past findings. However, we also found that the complete repertoire of within-subject  
383 seizure network dynamics is poorly characterised by a single, characteristic pathway; additionally,  
384 seizure variability is not fully described by temporal differences or early termination within the  
385 same pathway. We instead propose a model in which various decision points, existing on the  
386 framework of potential seizure pathways, produce a repertoire of seizure progressions (Fig. 8).  
387 While some parts of the progressions appear deterministic, at other times a decision point may  
388 determine 1) the seizure onset state, 2) the next network state, if multiple progressions are possible,  
389 or 3) whether the seizure terminates early in the state progression. This model would also explain  
390 why seizure variability can either manifest as relatively distinct seizure types or as a spectrum of  
391 dynamics. A greater number of decision points, which in turn produce a range of small variations  
392 between seizures, would produce a spectrum of seizure dynamics. Fewer decision points and/or  
393 separate seizure pathways could produce groups of seizures that each have a characteristic state  
394 progression. Importantly, although network states may contain information about pathological  
395 tissue<sup>7,43,62,63</sup>, the implications of multiple seizure pathways and onset states are uncertain. Further  
396 work is needed to determine whether the region responsible for generating seizures and/or its  
397 network interactions change across different seizure pathways.

398

399 The crucial question is then how these different seizure pathways arise from the same neural  
400 substrate. In theory, a range of changes before or during the seizure can affect its network  
401 progression. We hypothesise that spatiotemporal changes in the interictal neural state produce  
402 seizures with different characteristics. Past studies suggest that neural excitability<sup>19,64,65</sup>, inhibition<sup>61</sup>,  
403 and network interactions<sup>22,66</sup> influence certain spatiotemporal seizure features, such as the rate and  
404 extent of seizure propagation. These changes in brain state may be driven by various factors,  
405 including sleep<sup>21,50,51</sup>, hormones<sup>53–56</sup>, and medication<sup>57</sup>. Recently, prolonged recordings of patients  
406 with focal epilepsy have revealed that the rates of epileptiform discharges and seizures fluctuate  
407 according to both circadian and patient-specific multidien (approximately bi-weekly to monthly)  
408 cycles<sup>52</sup>. An intriguing possibility is that the same factors that rhythmically modulate seizure  
409 likelihood may also influence seizure dynamics. Surprisingly, although circadian and sleep cycles  
410 are known to impact seizure dynamics<sup>21,50,51</sup> and seizure likelihood<sup>23,52</sup>, few subjects in our study  
411 had seizure variability associated with circadian rhythms, suggesting that factors varying over  
412 longer timescales preferentially alter seizure dynamics. Alternatively, arousal levels and sleep stages  
413 may be more important than time-of-day in shaping seizure dynamics. Notably, we also observed  
414 that seizures with similar state progressions can have different durations in most subjects,  
415 suggesting that seizure duration is modulated independently of the seizure pathway. Ultimately, it  
416 is likely that various factors, with differential effects on seizure dynamics, interact to produce the  
417 observed repertoire of seizure network evolutions.

418

419 Notably, a large number of our human subjects underwent antiepileptic medication reduction as  
420 part of pre-surgical monitoring, making it difficult to disentangle the effects of changing drug levels  
421 from other potential slow-varying modulators of seizure dynamics. Changes in antiepileptic  
422 medication can impact neural excitability<sup>67–69</sup>, and medication tapering increases seizure likelihood  
423 in most patients<sup>16,70</sup>; however, it is controversial whether it also affects seizure patterns<sup>9,16,70,71</sup>. In  
424 some cases, it appears that medication tapering reveals latent seizure pathways that are suppressed  
425 by medication<sup>9</sup> or allows existing pathways to further progress (e.g., the secondary generalisation  
426 of typically focal seizures)<sup>16</sup>. It is possible that the impact of medication reduction on seizure  
427 dynamics is drug-, patient-, and dose-dependent, and may ultimately depend on how well the  
428 medication controls neuronal excitability<sup>64</sup>. Importantly, medication changes alone cannot account  
429 for the observed seizure variability in our cohort, as we observed temporal associations of seizure  
430 dynamics in patients that did not undergo medication tapering.

431

432 Contrary to the expectation that high levels of seizure variability may worsen surgical outcomes,  
433 we found no association between these patient features. It may be that only some types of  
434 variability, such as multifocal<sup>9</sup> or secondarily generalised<sup>72</sup> seizures, impact the likelihood of seizure  
435 freedom following surgery. Importantly, variability in the seizure onset network state does not  
436 indicate that a patient has multifocal seizures, as different network configurations can be associated  
437 with the same apparent ictal onset zone. Additionally, variability in seizure dynamics may not be  
438 inherently deleterious, as long as it is observed and accounted for when planning the surgical  
439 resection. Indeed, due to the short presurgical monitoring time and limited spatial coverage of the  
440 recording electrodes, some potential seizure pathways may not have been captured<sup>11,12</sup>, leading us  
441 to underestimate the level of variability in some subjects.

442

443 Although seizure variability was not associated with post-surgical seizure freedom, it may have  
444 implications for other clinical treatments. For example, in that same patient, seizures with different  
445 dynamics may have distinct preictal signatures, making seizure prediction more difficult<sup>10,24</sup>. A  
446 successful seizure prediction algorithm would either need to recognise multiple signatures or find  
447 common features among the disparate preictal dynamics. Additionally, neurostimulation offers a  
448 promising new approach for controlling seizures; however, in rodent models, the effectiveness of  
449 a given stimulation protocol depends on the preictal brain state<sup>18</sup>. Thus, such interventions may  
450 need to recognise and adapt to the specific characteristics of each seizure type in order to control  
451 all seizure dynamics. Importantly, our human cohort was limited to patients with medication  
452 refractory focal epilepsy who were candidates for surgical resection. The characteristics and clinical  
453 implications of seizure variability may be different in other patient cohorts.

454

455 In summary, we have shown that there is within-subject variation in seizure network dynamics in  
456 subjects with focal epilepsy. This variability is not limited to specific groups of patients, such as  
457 those with multifocal seizures; rather, variability in seizure pathways is common across all subjects.  
458 We propose that this variability arises from a set of decision points built on a framework of  
459 possible seizure progressions. Temporal changes in seizure dynamics suggest that slow-varying  
460 factors shape these seizure pathways, perhaps by modulating the background brain state. Further  
461 research is needed to determine whether preictal dynamics shape seizure pathways by controlling  
462 decisions in the seizure progression. Uncovering these mechanisms could provide novel  
463 approaches for predicting and controlling seizures that are tailored to the complete repertoire of  
464 pathological neural dynamics in each patient.



## 465 **Methods**

466

467 **Subject and seizure selection:** This work was a retrospective study that analysed seizures from  
468 13 patients from the Mayo Clinic and the Hospital of the University of Pennsylvania (available at  
469 [www.ieeg.org](http://www.ieeg.org)<sup>73,74</sup>) and 18 patients from the University College London Hospital (UCLH) who  
470 were diagnosed with refractory focal epilepsy and underwent presurgical monitoring. To explore  
471 seizure variability on longer time-scales, intracranial EEG was also analysed from three canine  
472 subjects with focal-onset seizures due to naturally occurring epilepsy that underwent prolonged  
473 recordings as part of a seizure prediction study<sup>12,45</sup> (available at [www.ieeg.org](http://www.ieeg.org)<sup>73,74</sup>). Subjects were  
474 selected without reference to cause or other characteristics of their pathology.

475

476 For all the iEEG portal patients, all patients gave consent to have their anonymised iEEG data  
477 publicly available on the International Epilepsy Electrophysiology Portal ([www.ieeg.org](http://www.ieeg.org))<sup>73,74</sup>. For  
478 the UCLH patients, their iEEG was anonymised and exported, and the anonymised data was  
479 subsequently analysed in this study under the approval of the Newcastle University Ethics  
480 Committee (reference number 6887/2018).

481

482 To be included in the study, each subject was required to have had at least six seizures suitable for  
483 the analysis. This threshold was chosen to allow examination of seizure variability in a broad cohort  
484 of subjects, while still ensuring that enough seizures were observed to draw conclusions about the  
485 forms, types, and characteristics of seizure variability in each subject. Seizures were excluded from  
486 the analysis if they did not have clear electrographic correlates (with clear onset and termination),  
487 if they were triggered by or occurred during cortical stimulation, if they had noisy segments, or if  
488 they had large missing segments. Periods of status epilepticus and continuous epileptiform  
489 discharges were also excluded. However, electrographic seizures without clinical correlates were  
490 included in the analysis. Additionally, in the canine subjects, to allow algorithmic identification of  
491 seizure termination (see “Seizure extraction in canine subjects”), seizures were only included if  
492 there was at least 330 s between the seizure start and the termination of the previous seizure, and  
493 if the preictal period (defined as three minutes to one minute before seizure start) lacked large  
494 noisy or missing segments.

495

496 Additional information about each subject and the analysed seizures is shown in Supplementary  
497 Tables S1.1 and S1.2.

498



499 **Data acquisition:** For each human subject, the placement of the intracranial electrodes was  
500 determined by the clinical team, independent of this study. In each canine subject, a total of sixteen  
501 electrodes, divided into strips of four electrodes, were placed bilaterally on the brain surface<sup>45</sup>,  
502 again independent of this study. In human subjects, ictal segments were identified and extracted  
503 for the analysis based on clinical seizure markings. In canine subjects, seizure start times were  
504 previously marked by a team of clinicians, and seizure termination times were determined  
505 algorithmically following preprocessing (see “Seizure extraction in canine subjects”).

506

507 **iEEG preprocessing:** For each subject, if different seizures were recorded at multiple sampling  
508 frequencies, all of the recordings were first downsampled to the lowest sampling frequency. Noisy  
509 channels were then removed based on visual inspection. In the remaining channels, short sections  
510 of missing values were linearly interpolated. These sections of missing values were <0.05 s with  
511 the exception of one segment in seizure 2 of subject “Study 020”, which was 0.514 s. All channels  
512 were re-referenced to a common average reference. Each channel’s time series was then bandpass  
513 filtered from 1-150 Hz (4<sup>th</sup> order, zero-phase Butterworth filter). To remove line noise, the time  
514 series were additionally notch filtered (4<sup>th</sup> order, 2 Hz width, zero-phase Butterworth filter) at 60  
515 and 120 Hz (iEEG Portal patients and canines) or 50, 100, and 150 Hz (UCLH patients).

516

517 **Seizure extraction in canine subjects:** Because seizure end times were not marked in the canine  
518 data, seizure termination was identified algorithmically using an approach similar to Schindler *et*  
519 *al.*<sup>35</sup>. In each channel, the time period containing seizure activity was first identified based on an  
520 increase in signal absolute slope,  $S(t)$ , compared to each seizure’s preictal period, which was defined  
521 as three minutes to one minute before the clinically marked seizure start. As a reminder, seizures  
522 with preictal periods with noisy or missing segments were excluded from the analysis, as were any  
523 seizures that occurred within 330 s of the preceding seizure’s termination (based on visual  
524 inspection).

525

526 The absolute slope  $S$  of each channel  $i$  was given by

527 
$$S_i(t) = |\Delta x_i / \Delta t|$$

528 where  $x_i$  is the time series voltage value of channel  $i$  and  $\Delta t$  is size of the time step, which was  
529 determined by the sampling frequency of the recording.  $S_i(t)$  was then normalised to  $S^*_i(t)$  by  
530 dividing each timepoint by  $\sigma_{i,pre}$ , the standard deviation of the absolute slope of channel  $i$  during  
531 the seizure’s preictal period, and smoothed by applying a 5 s moving average. Channel  $i$  was  
532 considered epileptic at time point  $t$  if  $S^*_i(t)$  was greater than or equal to 2.5. Seizure termination

533 was marked as the first time, following the clinically marked seizure start, when the number of  
534 epileptic channels fell below and remained below two channels for at least 1.5 s.

535

536 **Computing functional connectivity:** To compute the time-varying functional connectivity of  
537 each seizure, a 10 s sliding window, with 9 s overlap between consecutive windows, was applied  
538 to each preprocessed ictal time series. The same sliding window parameters have previously been  
539 used to estimate time-varying coherence in ictal iEEG data<sup>75</sup>. For each window, the coherence  
540 between each pair of iEEG channels was computed in six different frequency bands (delta 1-4 Hz,  
541 theta 4-8 Hz, alpha 8-13 Hz, beta 13-30 Hz, gamma 30-80 Hz, high gamma 80-150 Hz). The  
542 coherence in each frequency band was computed using band-averaged coherence, defined as

$$543 \quad C_{i,j}(f) = \frac{|\sum_{f=f_1}^{f_2} P_{i,j}(f)|^2}{\sum_{f=f_1}^{f_2} P_{i,i}(f) \sum_{f=f_1}^{f_2} P_{j,j}(f)}$$

544 where  $f_1$  and  $f_2$  are the lower and upper bounds of the frequency band,  $P_{i,j}(f)$  is the cross-spectrum  
545 density of channels  $i$  and  $j$ , and  $P_{i,i}(f)$  and  $P_{j,j}(f)$  are the autospectrum densities of channels  $i$  and  $j$ ,  
546 respectively. In each window, channel auto-spectrums and cross-spectrums were calculated using  
547 Welch's method (2 s sliding window with 1 s overlap).

548

549 Thus, in a subject with  $n$  iEEG channels, the functional connectivity of each time window was  
550 described by six symmetric, non-negative,  $n \times n$  matrices, in which each entry  $(i,j)$  gives the  
551 coherence between channels  $i$  and  $j$  in the given frequency band. Each matrix was then written in  
552 vector form by re-arranging the upper-triangular, off-diagonal elements into a single column vector  
553 of length  $(n^2 - n)/2$ . Each vector was then normalised so that the  $L1$  norm (i.e., sum of all elements)  
554 was 1, thus ensuring that differences between connectivity vectors captured a change in  
555 connectivity pattern rather than gross changes in global levels of coherence. This normalisation  
556 step also allowed the magnitude of seizure dissimilarities to be compared across patients with  
557 different numbers of electrodes. For each time window, the six connectivity vectors were then  
558 vertically concatenated together, forming a single column vector of length  $6 \cdot (n^2 - n)/2$ . Each  
559 subject's ictal connectivity vectors were subsequently horizontally concatenated together to form  
560 a matrix  $V$  containing  $6 \cdot (n^2 - n)/2$  features and  $m$  observations, where  $m$  is the total number of  
561 ictal windows across all seizures.

562

563 **Non-negative matrix factorization and network state assignment:** To extract recurring  
564 patterns of functional connectivity and reduce noise in the connectivity matrices, non-negative  
565 matrix factorization (NMF)<sup>46</sup> was used to approximately factor each subject's ictal time-varying

566 connectivity matrix  $V$  into two non-negative matrices,  $W$  and  $H$ , such that  $V \approx W \times H$ . The matrix  
567  $W$  contained subject-specific basis vectors, each of which had  $6 \times (n^2 - n) / 2$  features that captured  
568 a pattern of connectivity across all channels and frequency bands. Each original ictal time window  
569 was summarised as an additive combination of these basis vectors, with the coefficients matrix  $H$   
570 giving the contribution of each basis vector to each time window. These factorisations were  
571 subject-specific since the basis vector features depended on the iEEG electrode layout in each  
572 subject.

573

574 To determine the optimal number of basis vectors,  $r$ , for each subject, the highest  $r$  that produced  
575 consistent sets of basis vectors was found (see Supplementary Fig. S2.1 for details). This approach,  
576 known as stability NMF<sup>47</sup>, exploits the non-deterministic nature of NMF to identify the  $r$  at which  
577  $W$  consistently converges to a similar set of basis vectors. Since the resulting stable NMF basis  
578 vectors can be reliably found, they are thought to provide a meaningful representation of the data.  
579 To perform stability NMF for each subject, the value of  $r$  was scanned from 1 to 20. This scan  
580 range was chosen based on the observation that the stability of the factorisation greatly decreases  
581 at approximately  $r > 10$  in our data, and is consistent with the number of connectivity patterns  
582 typically found in ictal iEEG data in other studies<sup>7,42,43</sup>. At each  $r$ , NMF of  $V$  was performed 25  
583 times using the alternating nonnegative least squares with block principal pivoting method<sup>76,77</sup>.  
584 Each iteration used different random initializations of  $W$  and  $H$ , thus yielding 25 different  
585 factorizations of  $V$  at each value of  $r$ . Using the method established by Wu *et al.*<sup>47</sup>, for each  $r$ , the  
586 instability  $I$  of two sets of basis vectors  $W$  and  $W'$  was defined as

587 
$$I(r)_{W,W'} = \frac{1}{2r} \left( 2r - \sum_{j=1}^r \max_{1 \leq i \leq r} P_{ij} - \sum_{i=1}^r \max_{1 \leq j \leq r} P_{ij} \right)$$

588 where  $P$  is the Pearson's cross-correlation matrix of the sets of basis vectors. Low values of  $I$   
589 indicate that similar sets of basis vectors were found in the separate iterations; indeed, if the two  
590 sets of basis vectors are the same (minus reordering), then  $I = 0$ . The instability of all  $25 \times (25-1) / 2$   
591 pairs of basis vector sets was then averaged to produce  $I_{\text{avg}}(r)$ . The highest  $r$  with  $I_{\text{avg}}(r) \leq 0.005$  was  
592 selected for each subject, thus allowing small deviations between the observed basis vector sets,  
593 while still enforcing consistent factorisations across iterations. At this  $r$ , the factorisation yielding  
594 the lowest reconstruction error was used for the subsequent analysis.

595

596 We then used NMF to cluster observations based on the contributions of the basis vectors to each  
597 observation<sup>78,79</sup> (Supplementary Fig. S2.2). In our data, most subjects had a sparse coefficients

598 matrix  $H$ , with only a single highly-expressed basis vector in a given time window. As such, the  
599 dominant basis vector provided a simplified description of the functional connectivity at that time.  
600 Therefore, in each subject, each time window was assigned to a network state corresponding to  
601 the basis vector with the highest coefficient. Each seizure was then described as a progression of  
602 network states, enabling visualization of differences in network evolution between seizures.

603

604 While the NMF state progressions provided a simplified description of the seizure network  
605 dynamics, the entire functional connectivity time courses gave a more accurate description of the  
606 dynamics. However, small fluctuations in the connectivity due to noise would create a high baseline  
607 dissimilarity between seizures. Therefore, to reduce noise in the connectivity matrices, for each  
608 subject the selected factorisation was also used to create  $V^*=W \times H$ , a lower-rank approximation  
609 of the original time-varying seizure functional connectivity (Supplementary S2.2). This return to  
610 the original feature space is necessary since NMF basis vectors are not orthogonal, and distances  
611 in NMF basis vector space are therefore not equivalent to distances in feature space. Each  
612 reconstructed connectivity vector was then re-normalised to have an  $L1$  norm of 1, ensuring that  
613 differences in reconstruction accuracy did not affect the distances between different ictal  
614 timepoints.

615

616 **Computing seizure dissimilarity:** Following the NMF-based reconstruction of the seizure  
617 connectivity, the network evolution of each seizure was described by a multivariate time series  
618 with  $6 \times (n^2 - n) / 2$  features. To compare network evolutions across within-subject seizures, a  
619 “seizure dissimilarity matrix” was created for each subject. Each pair of seizure functional  
620 connectivity time series was first warped using dynamic time warping, which stretches each time  
621 series such that the total distance between the two time series is minimised (Supplementary S3).  
622 This step ensures that 1) similar network dynamics of the two seizures are aligned, and 2) the  
623 warped seizures are the same length. We chose to minimise the  $L1$  distance between each pair of  
624 seizures, as this metric provides a better measure of distances in high dimensional spaces<sup>80</sup>.

625

626 Following dynamic time warping, the  $L1$  distance between the pair of warped time series was  
627 computed, resulting in a vector of distances capturing the dissimilarity in the seizures’ network  
628 structures at each time point. The “seizure dissimilarity” between the two seizures was defined as  
629 the average distance across all warped time points. The seizure dissimilarity matrix contains the  
630 dissimilarities between all pairs of the subject’s seizures.

631

632 We wish to point out as a technical note that due to the warping step, the seizure dissimilarity  
633 measure is not a metric distance. Like a metric distance, all dissimilarities are non-negative, the  
634 dissimilarity of a seizure to itself is zero, and the dissimilarity between pairs of seizures is  
635 symmetric; however, the triangle inequality does not necessarily hold. In particular, any two  
636 seizures that follow approximately the same pathway will have a near-zero dissimilarity, regardless  
637 of their rates of progression along the pathway. However, their relationship to other seizures that  
638 share *part* of the same pathway will depend on how long (temporally) the seizures share the same  
639 pathway. Thus, although pairs of seizures may have a low dissimilarity, their relationships to other  
640 seizures may differ due to their different rates of progression. These situations can, in turn, lead  
641 to violations of the triangle inequality. These limitations should be considered if using the seizure  
642 dissimilarity measure as a substitute for a distance measure in future work. In our case, we also  
643 compared our dissimilarity measure to two metric distances of trajectories, the Fréchet distance  
644 and the Hausdorff distance. Our results are qualitatively similar regardless of the measure used to  
645 quantify seizure dissimilarity, and all conclusions still hold (Supplementary S10).

646

647 **Seizure clustering and cluster evaluation:** To identify groups of similar seizures in each subject,  
648 each subject's seizures were hierarchically clustered by using the seizure dissimilarity matrix as  
649 input for an agglomerative hierarchical clustering algorithm, UPGMA (unweighted pair group  
650 method with arithmetic mean). The hierarchical clustering resulted in a dendrogram that  
651 summarised the similarity between the subject's seizures. Note that the hierarchical clustering  
652 representation was an approximation of the seizure dissimilarities that forced all dissimilarities into  
653 a metric space.

654

655 The gap statistic<sup>49</sup>, which compares the within-cluster dispersion of a given clustering relative to a  
656 reference (null) distribution, was then used to determine if optimal flat (i.e., non-hierarchical)  
657 clusters of seizures existed in each subject. In order to generate reference datasets, the subject's  
658 seizures were first projected into Euclidean space using classical (Torgerson's) multidimensional  
659 scaling (MDS). Given the seizure dissimilarity matrix, MDS assigned a coordinate point to each  
660 seizure while attempting to preserve the specified dissimilarities between seizures. In order to most  
661 closely approximate the dissimilarities matrix, the seizures were projected onto the maximum  
662 possible number of dimensions; note, however, that like the hierarchical clustering, MDS also  
663 provided a metric approximation of the nonmetric dissimilarities. One thousand reference datasets  
664 were then generated by drawing coordinates from a uniform distribution placed over a box aligned  
665 with the principal components of the projected seizure data. Each reference dataset was

666 hierarchically clustered by computing the distances between the coordinate points and applying  
667 the UPGMA algorithm. To test for flat clusters in the seizure data and reference datasets, the  
668 dendrograms were cut at different levels to generate 1, 2, ...  $s$  clusters, where  $s$  is the number of  
669 seizures. At each number of clusters  $k$ , the gap statistic  $G(k)$  was computed by comparing the  
670 within-cluster dispersion of the observed seizures and the reference datasets. The multiple  
671 reference datasets also allowed calculation of the standard error of the gap statistic at each  $k$ ,  $SE(k)$ .  
672 The optimal number of clusters was defined as the smallest number of clusters where  $G(k) \geq$   
673  $G(k+1) - SE(k+1)$ , which identifies the point at which increasing the number of clusters provides  
674 little improvement in the clustering of the data<sup>49</sup>.

675

676 **Comparison to temporal features:** To determine if differences in seizure network evolution co-  
677 varied with differences in temporal features, three distance matrices were created for each subject:

- 678 • temporal distance matrix: the amount of time elapsed (measured in hours) between the  
679 onset times of each pair of seizures.
- 680 • duration distance matrix: the absolute difference (measured in seconds) in the temporal  
681 length of each pair of seizures.
- 682 • circadian distance matrix: the difference (measured in hours) in the time-of-day of the  
683 occurrence of each pair of seizures. This measure is a circular statistic that can range from  
684 0 to 12 hours.

685

686 For each subject, Spearman's correlation was computed between the upper triangular elements of  
687 the seizure dissimilarity matrix and each of above distance matrices. Since the distances in each  
688 matrix were not independent observations, the Mantel test<sup>81</sup> was used to determine the significance  
689 of each correlation. Briefly, for each matrix comparison, the rows and columns of one matrix were  
690 randomly permuted 10,000 times. The correlation between the two upper triangular elements was  
691 re-computed after each permutation, resulting in a distribution of correlation values that described  
692 the expected correlation if there were no relationship between the two matrices. The  $p$ -value of  
693 the association was then defined as the proportion of permuted correlation that were greater than  
694 or equal to the observed correlation. To correct for multiple comparisons, the Benjamini-  
695 Hochberg false discovery rate (FDR) correction<sup>82</sup> was applied to the set of  $p$ -values from all matrix  
696 comparisons across all subjects (34x3 total tests). The correlation was considered significant if the  
697 associated adjusted  $p$ -value was less than 0.05.

698



699 As discussed earlier, the dissimilarity between seizures with partially shared dynamics will partly  
700 depend on the temporal duration of the shared dynamics, relative to the warped seizure length.  
701 We therefore caution that our seizure dissimilarity measure (computed using dynamic time  
702 warping) is not always independent of seizure temporal duration. To determine the robustness of  
703 the relationship between seizure dissimilarities and seizure duration distances, as well as the  
704 robustness of our other primary results, we additionally computed seizure dissimilarity using two  
705 metric distance measures, the Fréchet and Hausdorff distances, which are independent of seizure  
706 durations. Using these alternative measures, we then repeated our analysis of seizure clustering and  
707 the comparison of seizure dissimilarities with other seizure features (Supplementary S10).

708

## 709 **Statistics**

710

711 The number of seizures analysed in each subject was determined by the number of seizures suitable  
712 for analysis (see “Subject and seizure selection”) captured during each iEEG recording. These  
713 sample sizes are available in Supplementary Tables S1.1 and S1.2. The results focused on qualitative  
714 visualisation of within-subject seizure pathways and quantitative comparison of within-subject  
715 seizure dynamics, without assigning statistical significance to the similarity of the seizure dynamics.  
716 To find an optimal number of seizure clusters based on seizure dynamics in each subject, we used  
717 the gap statistic<sup>49</sup> (details in “Seizure clustering and cluster evaluation”). Additionally, in each  
718 subject, we used Spearman’s correlation to quantify the relationship between the subject’s seizure  
719 dissimilarity matrix and three distance matrices describing other seizure features (see “Comparison  
720 with temporal features”). A  $p$ -value for each association was then determined using a permutation  
721 test (one-tailed Mantel test<sup>81</sup>). Global FDR correction, using the Benjamini-Hochberg algorithm<sup>82</sup>,  
722 was then applied to all 34x3 (number of subjects x number of within-subject comparisons)  $p$ -  
723 values, and a correlation was considered significant if the associated adjusted  $p$ -value was less than  
724 0.05.

725

## 726 **Code and data availability**

727 All data was analysed using MATLAB version R2018b. To perform NMF, we used the  
728 Nonnegative Matrix Factorization Algorithms Toolbox, available at  
729 <https://github.com/kimjingu/nonnegfac-matlab/>, which implements the alternating nonnegative  
730 least squares with block principal pivoting algorithm<sup>76,77</sup>. For the remainder of the analysis, we used  
731 MATLAB implementations of standard algorithms (dynamic time warping: `dtw`, hierarchical  
732 clustering: `linkage`, multidimensional scaling: `cmdscale`, gap statistic: `evalclusters`, FDR



733 correction: `mafdx`) or custom code. The iEEG time series of all IIEEG Portal subjects is available  
734 at [www.ieeg.org](http://www.ieeg.org). The NMF factorisation of each subject's data, along with the code for producing  
735 the primary downstream results (state progressions, seizure dissimilarity matrices, clustering, and  
736 comparison with temporal features) is published on Zenodo  
737 (<http://dx.doi.org/10.5281/zenodo.3240102>).

738

### 739 **Acknowledgements**

740 We thank Gerold Baier, Christoforos Papasavvas, Nishant Sinha, and the rest of the CNNP lab  
741 for discussions on the analysis and manuscript. We thank Andrew McEvoy and Anna Misericchi  
742 for undertaking the epilepsy surgery at QS, and Catherine Scott, Roman Rodionov, and Sjoerd  
743 Vos for helping with data organisation.

744

745 PNT and YW gratefully acknowledge funding from Wellcome Trust (208940/Z/17/Z and  
746 210109/Z/18/Z).

747

748 The authors declare no conflict of interest.

749

### 750 **Author contributions**

751 G.M.S and Y.W. conceived the idea and developed the methods. B.D. oversaw clinical  
752 acquisition and annotation of the UCLH patient EEG data. G.M.S., P.N.T and Y.W. organised  
753 the data. G.M.S. performed the visualisation and analysis. Y.W. validated the analysis. G.M.S.  
754 drafted the manuscript. All authors participated in critically reviewing and revising the  
755 manuscript.

756 **References**

757

- 758 1. Rosenow, F. & Lüders, H. Presurgical evaluation of epilepsy. *Brain* **124**, 1683–1700 (2001).
- 759 2. Kramer, M. a *et al.* Coalescence and fragmentation of cortical networks during focal seizures. *J. Neurosci.* **30**, 10076–
- 760 10085 (2010).
- 761 3. Schindler, K. *et al.* Forbidden ordinal patterns of periictal intracranial EEG indicate deterministic dynamics in human
- 762 epileptic seizures. *Epilepsia* **52**, 1771–1780 (2011).
- 763 4. Truccolo, W. *et al.* Single-neuron dynamics in human focal epilepsy. *Nat. Neurosci.* **14**, 635–641 (2011).
- 764 5. Schevon, C. A. *et al.* Evidence of an inhibitory restraint of seizure activity in humans. *Nat. Commun.* **3**, 1060 (2012).
- 765 6. Wagner, F. B. *et al.* Microscale spatiotemporal dynamics during neocortical propagation of human focal seizures.
- 766 *Neuroimage* **122**, 114–130 (2015).
- 767 7. Burns, S. P. *et al.* Network dynamics of the brain and influence of the epileptic seizure onset zone. *Proc. Natl. Acad. Sci.*
- 768 **111**, E5321–E5330 (2014).
- 769 8. Karoly, P. J. *et al.* Seizure pathways : a model-based investigation. *PLoS Comput. Biol.* **14**, e1006403 (2018).
- 770 9. Spencer, S. S., Spencer, D. D., Williamson, P. D. & Mattson, R. H. Ictal effects of anticonvulsant medication withdrawal
- 771 in epileptic patients. *Epilepsia* **22**, 297–307 (1981).
- 772 10. Freestone, D. R., Karoly, P. J. & Cook, M. J. A forward-looking review of seizure prediction. *Curr. Opin. Neurol.* **30**,
- 773 167–173 (2017).
- 774 11. King-Stephens, D. *et al.* Lateralization of mesial temporal lobe epilepsy with chronic ambulatory electrocorticography.
- 775 *Epilepsia* **56**, 959–967 (2015).
- 776 12. Ung, H. *et al.* Temporal behavior of seizures and interictal bursts in prolonged intracranial recordings from epileptic
- 777 canines. *Epilepsia* **57**, 1949–1957 (2016).
- 778 13. Alarcon, G., Binnie, C. D., Elwes, R. D. C. & Polkey, C. E. Power spectrum and intracranial EEG patterns at seizure
- 779 onset in partial epilepsy. *Electroencephalogr. Clin. Neurophysiol.* **94**, 326–337 (1995).
- 780 14. Jiménez-Jiménez, D. *et al.* Prognostic value of intracranial seizure onset patterns for surgical outcome of the treatment
- 781 of epilepsy. *Clin. Neurophysiol.* **126**, 257–267 (2015).
- 782 15. Karthick, P., Tanaka, H., Khoo, H. & Gotman, J. Prediction of secondary generalization from a focal onset seizure in
- 783 intracerebral EEG. *Clin. Neurophysiol.* **129**, 1030–1040 (2018).
- 784 16. Marciani, M. G. & Gotman, J. Effects of drug withdrawal on location of seizure onset. *Epilepsia* **27**, 423–431 (1986).
- 785 17. Martinet, L. E., Ahmed, O. J., Lepage, K. Q., Cash, S. S. & Kramer, M. A. Slow spatial recruitment of neocortex during
- 786 secondarily generalized seizures and its relation to surgical outcome. *J. Neurosci.* **35**, 9477–9490 (2015).
- 787 18. Ewell, L. A. *et al.* Brain state is a major factor in pre-seizure hippocampal network activity and influences success of
- 788 seizure intervention. *J. Neurosci.* **35**, 15635–15648 (2015).
- 789 19. Badawy, R., Macdonell, R., Jackson, G. & Berkovic, S. The peri-ictal state: Cortical excitability changes within 24 h of a
- 790 seizure. *Brain* **132**, 1013–1021 (2009).
- 791 20. Gliske, S. V. *et al.* Variability in the location of high frequency oscillations during prolonged intracranial EEG
- 792 recordings. *Nat. Commun.* **9**, 2155 (2018).
- 793 21. Bazil, C. W. & Walczak, T. S. Effects of sleep and sleep stage on epileptic and nonepileptic seizures. *Epilepsia* **38**, 56–62
- 794 (1997).
- 795 22. Khambhati, A. N., Davis, K. A., Lucas, T. H., Litt, B. & Bassett, D. S. Virtual cortical resection reveals push-pull
- 796 network control preceding seizure evolution. *Neuron* **91**, 1170–1182 (2016).
- 797 23. Karoly, P. J. *et al.* The circadian profile of epilepsy improves seizure forecasting. *Brain* **140**, 2169–2182 (2017).
- 798 24. Cook, M. J. *et al.* Human focal seizures are characterized by populations of fixed duration and interval. *Epilepsia* **57**, 359–
- 799 368 (2016).
- 800 25. Takahashi, H., Takahashi, S., Kanzaki, R. & Kawai, K. State-dependent precursors of seizures in correlation-based
- 801 functional networks of electrocorticograms of patients with temporal lobe epilepsy. *Neurol. Sci.* **33**, 1355–1364 (2012).

- 802 26. Louis Door, V., Caparos, M., Wendling, F., Vignal, J.-P. & Wolf, D. Extraction of reproducible seizure patterns based  
803 on EEG scalp correlations. *Biomed. Signal Process. Control* **2**, 154–162 (2007).
- 804 27. Wendling, F., Bellanger, J.-J., Badier, J.-M. & Coatrieux, J.-L. Extraction of spatio-temporal signatures from depth EEG  
805 seizure signals based on objective matching in warped vectorial observations. *IEEE Trans. Biomed. Eng.* **43**, 990–1000  
806 (1996).
- 807 28. Wu, L. & Gotman, J. Segmentation and classification of EEG during epileptic seizures. *Electroencephalogr. Clin.*  
808 *Neurophysiol.* **106**, 344–356 (1998).
- 809 29. Le Bouquin-Jeannès, R., Wendling, F., Faucon, G. & Bartolomei, F. Mise en correspondance de relations inter-  
810 structures lors de crises d'épilepsie. *ITBM-RBM* **23**, 4–13 (2002).
- 811 30. Wendling, F., Shamsollahi, M. B., Badier, J. M. & Bellanger, J. J. Time-frequency matching of warped depth-EEG  
812 seizure observations. *IEEE Trans. Biomed. Eng.* **46**, 601–605 (1999).
- 813 31. Wendling, F., Badier, J., Chauvel, P. & Coatrieux, J. A method to quantify invariant information in depth-recorded  
814 epileptic seizures. *Electroencephalogr. Clin. Neurophysiol.* **102**, 472–485 (1997).
- 815 32. Bartolomei, F. *et al.* Pre-ictal synchronicity in limbic networks of mesial temporal lobe epilepsy. *Epilepsy Res.* **61**, 89–104  
816 (2004).
- 817 33. Spencer, S. S. Neural networks in human epilepsy: evidence of and implications for treatment. *Epilepsia* **43**, 219–227  
818 (2002).
- 819 34. Rummel, C. *et al.* A systems-level approach to human epileptic seizures. *Neuroinformatics* **11**, 159–173 (2013).
- 820 35. Schindler, K., Leung, H., Elger, C. E. & Lehnertz, K. Assessing seizure dynamics by analysing the correlation structure  
821 of multichannel intracranial EEG. *Brain* **130**, 65–77 (2007).
- 822 36. Wendling, F., Bartolomei, F., Bellanger, J. J., Bourien, J. & Chauvel, P. Epileptic fast intracerebral EEG activity:  
823 evidence for spatial decorrelation at seizure onset. *Brain* **126**, 1449–1459 (2003).
- 824 37. Schindler, K. A., Bialonski, S., Horstmann, M.-T., Elger, C. E. & Lehnertz, K. Evolving functional network properties  
825 and synchronizability during human epileptic seizures. *Chaos* **18**, 033119 (2008).
- 826 38. Schindler, K., Elger, C. E. & Lehnertz, K. Increasing synchronization may promote seizure termination: evidence from  
827 status epilepticus. *Clin. Neurophysiol.* **118**, 1955–1968 (2007).
- 828 39. Kramer, M. A. & Cash, S. S. Epilepsy as a disorder of cortical network organization. *Neuroscientist* **18**, 360–372 (2012).
- 829 40. Kramer, M. A., Kolaczyk, E. D. & Kirsch, H. E. Emergent network topology at seizure onset in humans. *Epilepsy Res.*  
830 **79**, 173–186 (2008).
- 831 41. Guye, M. *et al.* The role of corticothalamic coupling in human temporal lobe epilepsy. *Brain* **129**, 1917–1928 (2006).
- 832 42. Khambhati, A. N. *et al.* Dynamic network drivers of seizure generation, propagation and termination in human  
833 neocortical epilepsy. *PLoS Comput. Biol.* **11**, e1004608 (2015).
- 834 43. Khambhati, A. N. *et al.* Recurring functional interactions predict network architecture of interictal and ictal states in  
835 neocortical epilepsy. *eNeuro* **4**, e0091–16.2017 (2017).
- 836 44. Bettus, G. *et al.* Enhanced EEG functional connectivity in mesial temporal lobe epilepsy. *Epilepsy Res.* **81**, 58–68 (2008).
- 837 45. Howbert, J. J. *et al.* Forecasting seizures in dogs with naturally occurring epilepsy. *PLoS One* **9**, e81920 (2014).
- 838 46. Lee, D. D. & Seung, H. S. Learning the parts of objects by non-negative matrix factorization. *Nature* **401**, 788–791  
839 (1999).
- 840 47. Wu, S. *et al.* Stability-driven nonnegative matrix factorization to interpret spatial gene expression and build local gene  
841 networks. *Proc. Natl. Acad. Sci.* **113**, 4290–4295 (2016).
- 842 48. Sakoe, H. & Seibi, C. Dynamic programming algorithm optimization for spoken word recognition. *IEEE Trans.*  
843 *Acoustics, Speech, Signal Process.* **ASSP-26**, 43–49 (1978).
- 844 49. Tibshirani, R., Walther, G. & Hastie, T. Estimating the number of clusters in a data set via the gap statistic. *J. R. Stat.*  
845 *Soc. Ser. B (Statistical Methodol.* **63**, 411–423 (2001).
- 846 50. Bazil, C. W. Seizure modulation by sleep and sleep state. *Brain Res.* **1703**, 13–17 (2018).
- 847 51. Sinha, S., Brady, M., Scott, C. A. & Walker, M. C. Do seizures in patients with refractory epilepsy vary between

- 848 wakefulness and sleep? *J. Neurol. Neurosurg. Psychiatry* **77**, 1076–1078 (2006).
- 849 52. Baud, M. O. *et al.* Multi-day rhythms modulate seizure risk in epilepsy. *Nat. Commun.* **9**, 1–10 (2018).
- 850 53. Harden, C. L. & Pennell, P. B. Neuroendocrine considerations in the treatment of men and women with epilepsy. *Lancet*
- 851 *Neurol.* **12**, 72–83 (2013).
- 852 54. Reddy, D. S. & Rogawski, M. A. Neurosteroids — endogenous regulators of seizure susceptibility and role in the
- 853 treatment of epilepsy. in *Jasper's Basic Mechanisms of the Epilepsies* (eds. Noebels, J. L., Avoli, M., Rogawski, M. A., Olsen,
- 854 R. W. & Delgado-Escueta, A. V) 984–1002 (National Center for Biotechnology Information (US), 2013).
- 855 55. Taubøll, E., Sveberg, L. & Svalheim, S. Interactions between hormones and epilepsy. *Seizure* **28**, 3–11 (2015).
- 856 56. den Heijer, J. M. *et al.* The relation between cortisol and functional connectivity in people with and without stress-
- 857 sensitive epilepsy. *Epilepsia* **59**, 179–189 (2018).
- 858 57. Meisel, C. *et al.* Intrinsic excitability measures track antiepileptic drug action and uncover increasing/decreasing
- 859 excitability over the wake/sleep cycle. *Proc. Natl. Acad. Sci.* **112**, 14694–14699 (2015).
- 860 58. Nevado-Holgado, A. J., Marten, F., Richardson, M. P. & Terry, J. R. Characterising the dynamics of EEG waveforms as
- 861 the path through parameter space of a neural mass model: Application to epilepsy seizure evolution. *Neuroimage* **59**,
- 862 2374–2392 (2012).
- 863 59. Freestone, D. R. *et al.* Estimation of effective connectivity via data-driven neural modeling. *Front. Neurosci.* **8**, 1–20
- 864 (2014).
- 865 60. Jirsa, V. K., Stacey, W. C., Quilichini, P. P., Ivanov, A. I. & Bernard, C. On the nature of seizure dynamics. *Brain* **137**,
- 866 2210–2230 (2014).
- 867 61. Wenzel, M., Hamm, J. P., Peterka, D. S. & Yuste, R. Reliable and elastic propagation of cortical seizures in vivo. *Cell*
- 868 *Rep.* **19**, 2681–2693 (2017).
- 869 62. Sinha, N. *et al.* Predicting neurosurgical outcomes in focal epilepsy patients using computational modelling. *Brain* **140**,
- 870 319–332 (2016).
- 871 63. Goodfellow, M. *et al.* Estimation of brain network ictogenicity predicts outcome from epilepsy surgery. *Sci. Rep.* **6**,
- 872 29215 (2016).
- 873 64. Napolitano, C. E. & Orriols, M. A. Changing patterns of propagation in a super-refractory status of the temporal lobe.
- 874 Over 900 seizures recorded over nearly one year. *Epilepsy Behav. Case Reports* **1**, 126–131 (2013).
- 875 65. Wang, Y. *et al.* Mechanisms underlying different onset patterns of focal seizures. *PLoS Comput. Biol.* **13**, e1005475 (2017).
- 876 66. Proix, T., Jirsa, V. K., Bartolomei, F., Guye, M. & Truccolo, W. Predicting the spatiotemporal diversity of seizure
- 877 propagation and termination in human focal epilepsy. *Nat. Commun.* **9**, 1088 (2018).
- 878 67. Meisel, C., Plenz, D., Schulze-Bonhage, A. & Reichmann, H. Quantifying antiepileptic drug effects using intrinsic
- 879 excitability measures. *Epilepsia* **57**, e210–e215 (2016).
- 880 68. Badawy, R. A. B., Macdonell, R. A. L., Berkovic, S. F., Newton, M. R. & Jackson, G. D. Predicting seizure control:
- 881 cortical excitability and antiepileptic medication. *Ann. Neurol.* **67**, 64–73 (2010).
- 882 69. Badawy, R. A. B., Jackson, G. D., Berkovic, S. F. & Macdonell, R. A. L. Cortical excitability and refractory epilepsy: a
- 883 three-year longitudinal transcranial magnetic stimulation study. *Int. J. Neural Syst.* **23**, 1250030 (2013).
- 884 70. Bardy, A. H. Reduction of antiepileptic drug dosage for monitoring epileptic seizures. *Acta Neurol Scand* **86**, 466–469
- 885 (1992).
- 886 71. Engel, J. J. & Crandall, P. H. Falsely localising ictal onsets with depth EEG telemetry during anticonvulsant withdrawal.
- 887 *Epilepsia* **24**, 344–355 (1983).
- 888 72. Baud, M. O., Vulliemoz, S. & Seeck, M. Recurrent secondary generalization in frontal lobe epilepsy: predictors and a
- 889 potential link to surgical outcome? *Epilepsia* **56**, 1454–1462 (2015).
- 890 73. Wagenaar, J. B., Brinkmann, B. H., Ives, Z., Worrell, G. A. & Litt, B. A multimodal platform for cloud-based
- 891 collaborative research. *Int. IEEE/EMBS Conf. Neural Eng.* 1386–1389 (2013). doi:10.1109/NER.2013.6696201
- 892 74. Kini, L. G., Davis, K. A. & Wagenaar, J. B. Data integration: combined imaging and electrophysiology data in the cloud.
- 893 *Neuroimage* **124**, 1175–1181 (2016).

- 894 75. Martinet, L.-E. *et al.* Human seizures couple across spatial scales through travelling wave dynamics. *Nat. Commun.* **8**,  
895 14896 (2017).
- 896 76. Kim, J., He, Y. & Park, H. Algorithms for nonnegative matrix and tensor factorizations: a unified view based on block  
897 coordinate descent framework. *J. Glob. Optim.* **58**, 285–319 (2014).
- 898 77. Kim, J. & Park, H. Fast nonnegative matrix factorization: an active-set-like method and comparisons. *SIAM J. Sci.*  
899 *Comput.* **33**, 3261–3281 (2011).
- 900 78. Brunet, J. P., Tamayo, P., Golub, T. R. & Mesirov, J. P. Metagenes and molecular pattern discovery using matrix  
901 factorization. *Proc Natl Acad Sci U S A* **101**, 4164–4169 (2004).
- 902 79. Kim, H. & Park, H. Sparse non-negative matrix factorizations via alternating non-negativity-constrained least squares  
903 for microarray data analysis. *Bioinformatics* **23**, 1495–1502 (2007).
- 904 80. Aggarwal, C. C., Hinneburg, A. & Keim, D. A. On the surprising behavior of distance metrics in high dimensional  
905 space. *Database Theory – ICDT 2001* 420–434 (2001). doi:10.1007/3-540-44503-X\_27
- 906 81. Mantel, N. The detection of disease clustering and a generalized regression approach. *Cancer Res.* **27**, 209–220 (1967).
- 907 82. Benjamini, Y. & Hochberg, Y. Controlling the false discovery rate: a practical and powerful approach to multiple  
908 testing. *J. R. Stat. Soc. Ser. B* **57**, 289–300 (1995).
- 909

910

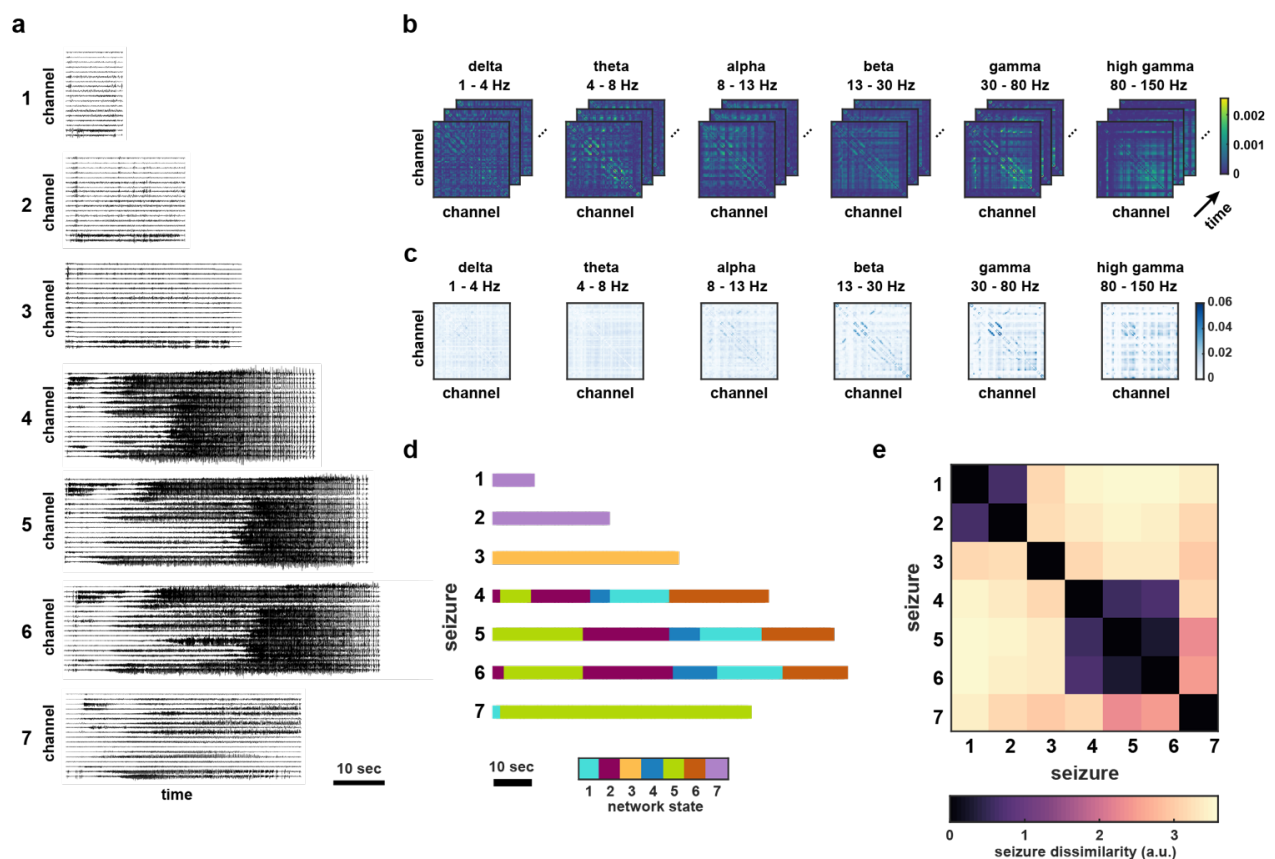

911

912 **Fig. 1: Visualisation and comparison of seizure network dynamics in an example subject,**

913 **P1.** (a) Intracranial EEG traces of seven seizures of subject P1. (b) The first three windows of the

914 sliding-window functional connectivity, defined as coherence in six different frequency bands, of

915 seizure 4. The entire network evolution of the seizure was described by six sets of connectivity

916 matrices. Each connectivity matrix was normalised such that the upper triangular elements sum to

917 one. (c) Example seizure network state (state 5), derived using non-negative matrix factorisation.

918 (d) State progressions of subject P1's seizures, which provide a visual summary of the seizure's

919 pathway through network space. Each state is indicated by a different colour. (e) Subject P1's

920 seizure dissimilarity matrix, which quantifies the difference in the network evolutions of each pair

921 of seizures. A low dissimilarity indicates that the two seizures have similar pathways through

922 network space.



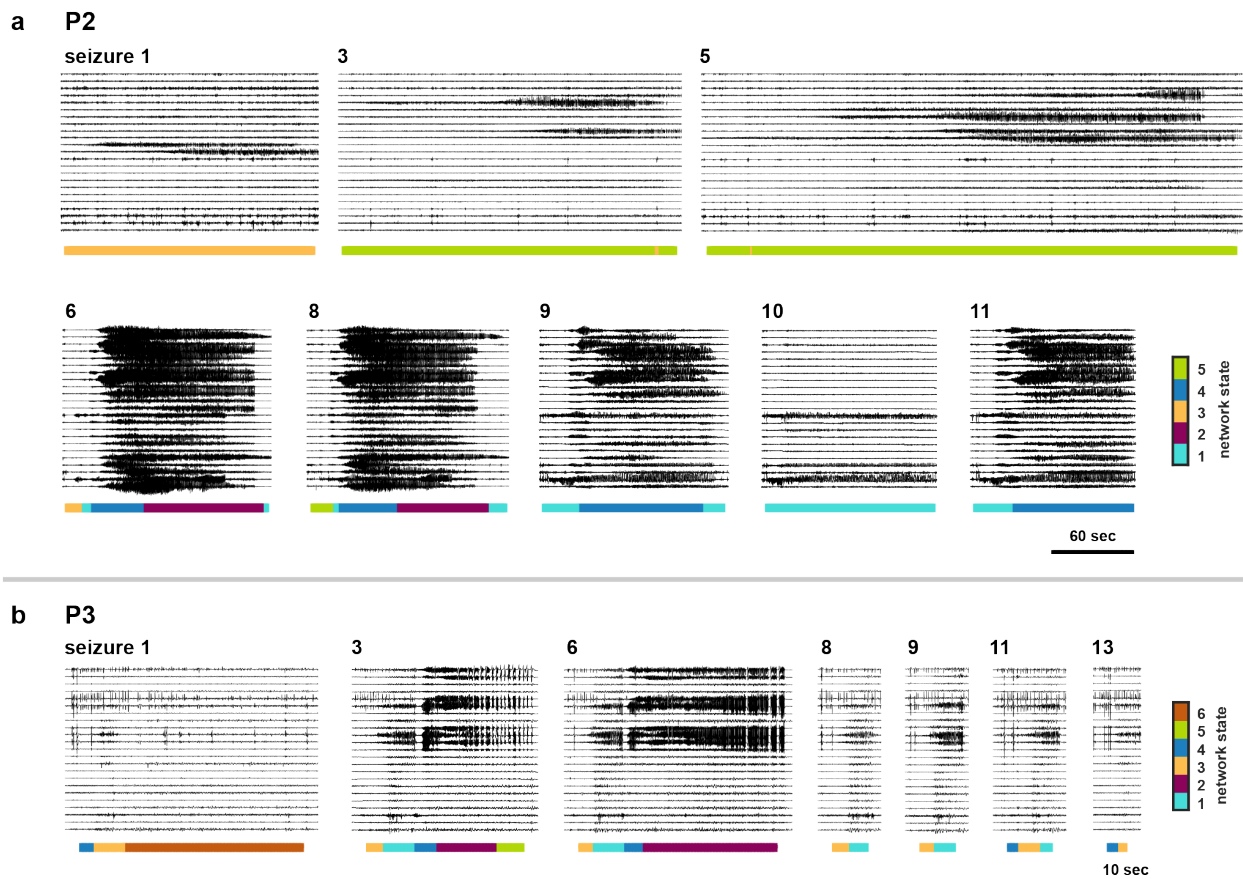

923

924

925 **Fig. 2: Within-subject variability in seizure network progressions.** The iEEG traces and  
926 corresponding network states of selected seizures from subjects P2 (a) and P3 (b). Seizures are  
927 numbered by the order of their occurrence in each subject. The seizure network progressions of  
928 subjects P2 and P3 were described by five (a) and six (b) network states, respectively, with each  
929 network state indicated by a different colour. The state progression of each seizure is placed  
930 beneath the ictal iEEG, with each state in the centre of the corresponding time window. Note that  
931 due to the 10 s sliding window, each network state corresponds to 10 s of the iEEG trace; thus,  
932 transitions in the dynamics seen on the iEEG may not be exactly aligned to changes in the network  
933 states.



934

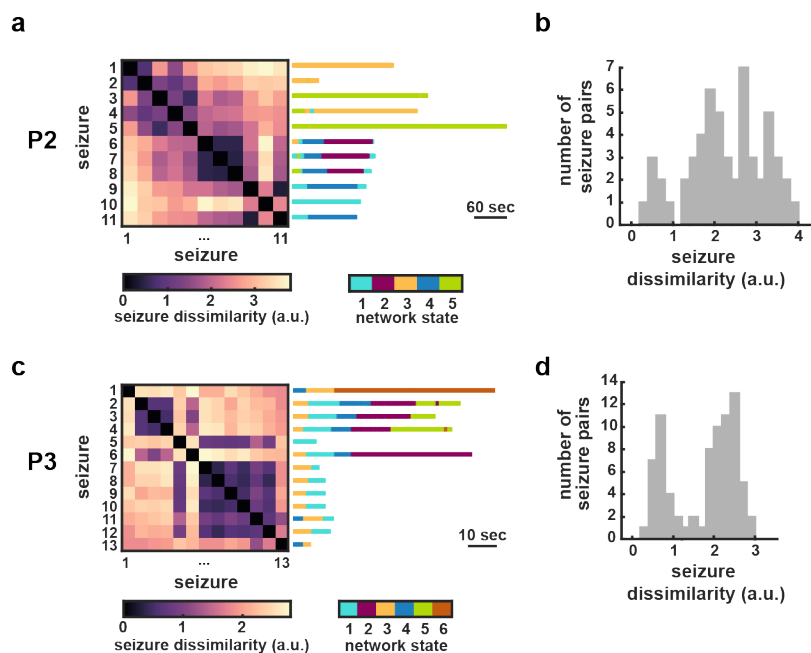

935

936 **Fig. 3: Seizure dissimilarity matrices and distributions in example subjects.** The seizure  
937 dissimilarity matrices of subjects P2 (a) and P3 (c) describe the dissimilarity in the network  
938 evolution of each pair of seizures. A low dissimilarity (close to zero) indicates that the two seizures  
939 have similar network evolutions. To the right of each matrix, the corresponding state progressions  
940 of each seizure are shown, allowing a comparison between seizure dissimilarities and network state  
941 progressions. For example, in subject P2 (a), there were low dissimilarities between seizures 6-8,  
942 all of which had similar network progressions. (b, d) The distributions of seizure dissimilarities in  
943 each subject. Note that in both histograms, each observation corresponds to a seizure pair, rather  
944 than a single seizure. Subject P2 (b) had a wide range of seizure dissimilarities, while in subject P3  
945 (d), there were either relatively low or high dissimilarities between seizures, forming a bimodal  
946 distribution.

947

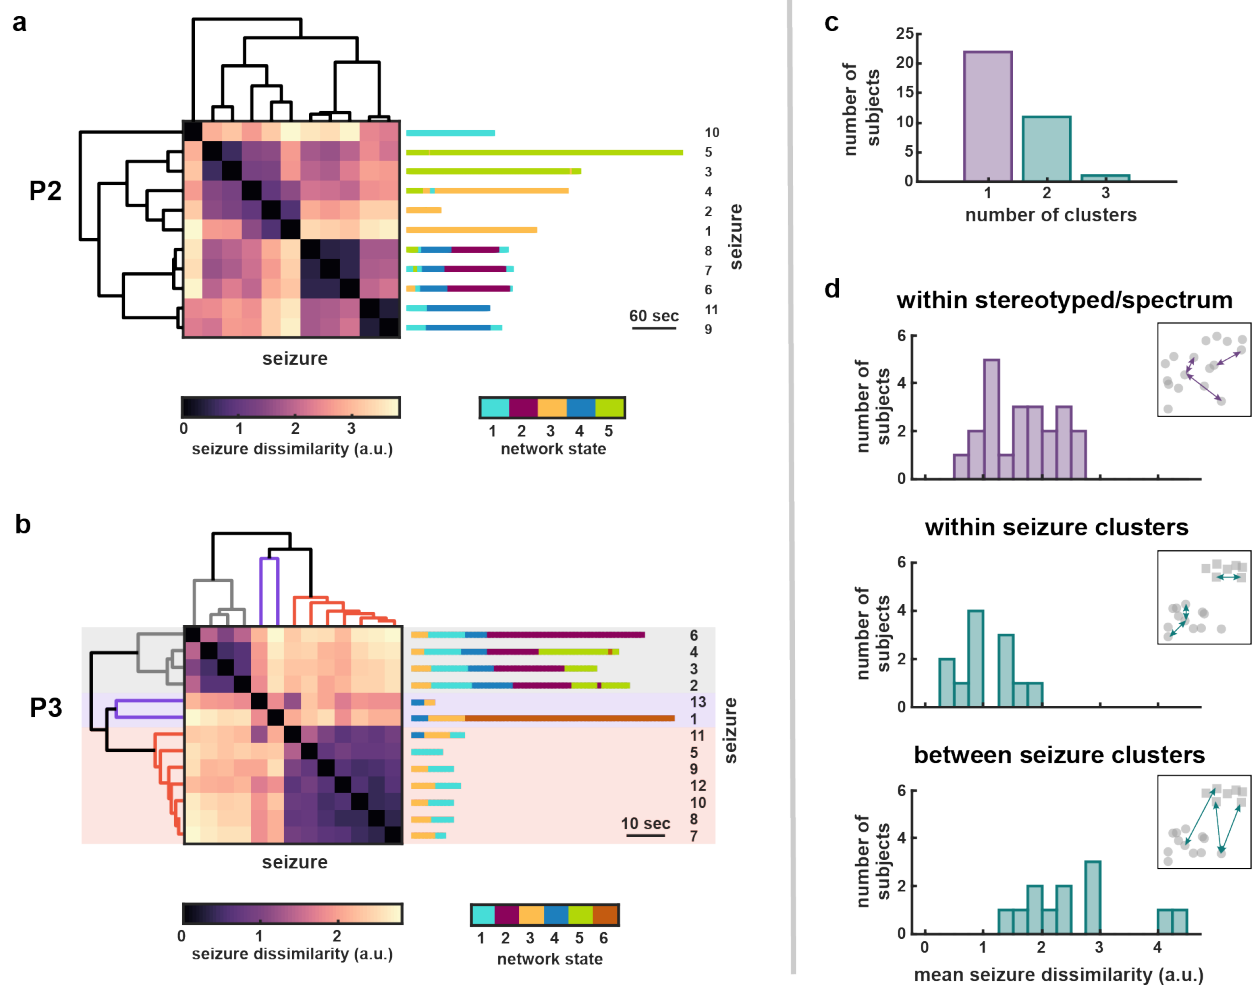

948

949 **Fig. 4: The form and amount of seizure variability differs across subjects.** Seizure clustering  
 950 results of subjects P2 (a) and P3 (b). The seizure dissimilarity matrices and seizure state  
 951 progressions are the same as in Fig. 3, but now sorted to match the seizure order of the  
 952 dendrograms, which describe the hierarchical clustering of the seizures. More similar seizures,  
 953 represented by leaves on the dendrogram, are joined by nodes. The height of the node linking two  
 954 seizures (or groups of seizures) represents the dissimilarity between them, with higher nodes  
 955 indicating less similar seizures. (a) In subject P2, an optimal non-hierarchical clustering of seizures  
 956 was not found; instead, seizures were best described by the hierarchical clustering. (b) In subject  
 957 P3, seizure dynamics were best described by three non-hierarchical clusters (grey, purple, and red  
 958 dendrogram leaves). (c, d) Analysis of seizure variability across subjects. Histograms and bars in  
 959 purple correspond to data from subjects with a single seizure cluster, while those in teal correspond  
 960 to data from subjects with two or more seizure clusters. (c) Bar chart of the number of seizure  
 961 clusters in each subject. (d) Histograms of seizure dissimilarities, averaged across pairs of seizures  
 962 within a subject. The top histogram shows dissimilarities in subjects with a single seizure cluster,

963 indicating that dynamics were either stereotyped or formed a spectrum. The bottom two  
964 histograms show seizure dissimilarities within and between seizure clusters in the remaining  
965 subjects, each of which had at least two seizure clusters. The inset of each histogram shows a  
966 schematic illustration of the type of variability (spectrum vs. clustered) and the type of distance  
967 (within vs. between cluster/spectrum) investigated. Each gray point represents a seizure, and  
968 arrows between seizures provide examples of the dissimilarities used in the computation.

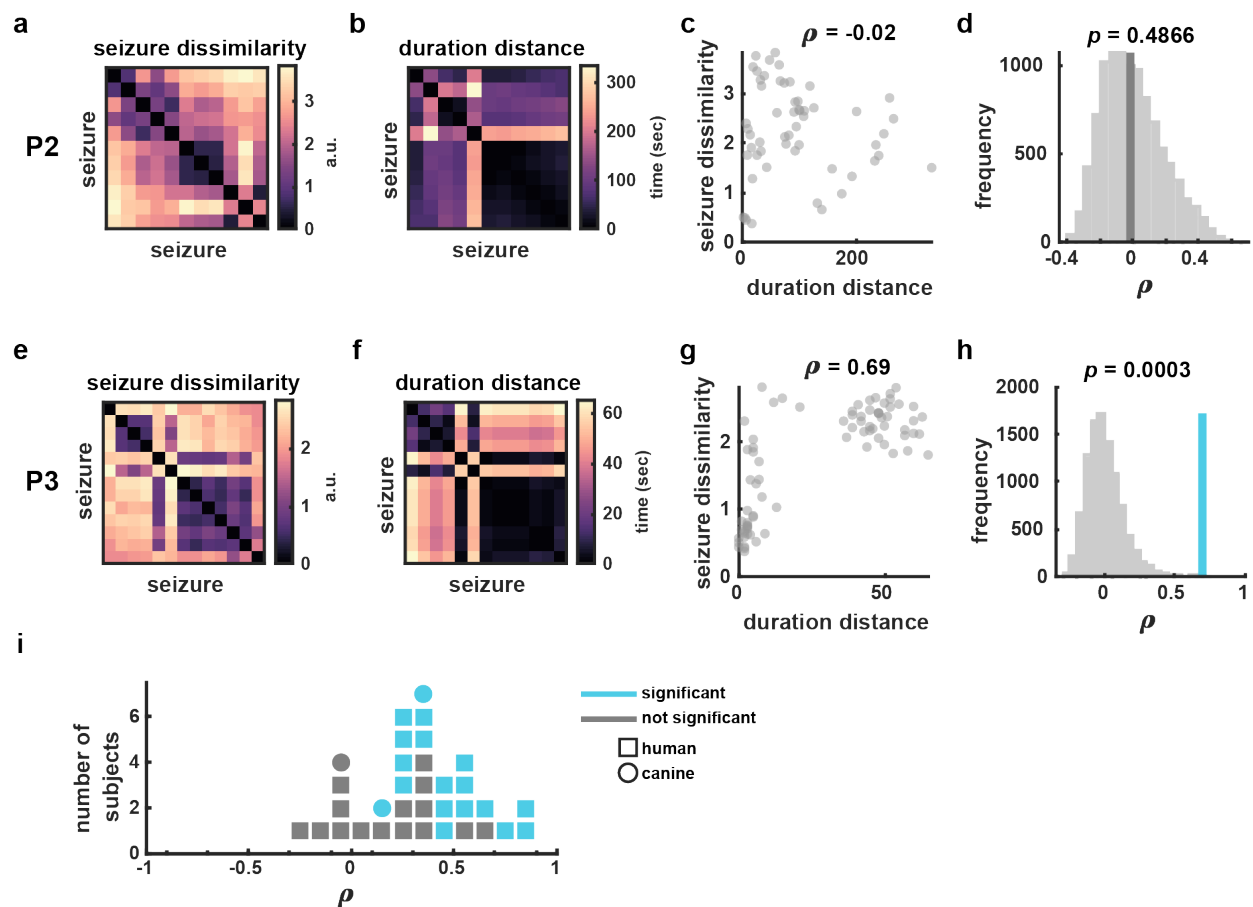

969

970 **Fig. 5: Comparison of seizure dissimilarities and duration distances.** The comparison of  
 971 seizure dissimilarities and duration distances is shown for subjects P2 (a-d) and P3 (e-h), along  
 972 with results across all subjects (i). (a and e) Seizure dissimilarity matrices, summarising differences  
 973 in seizure network dynamics within each subject (same as Fig. 3). (b, f) Duration distance matrices.  
 974 Each entry corresponds to the absolute difference in seizure duration, in seconds, between two  
 975 seizures. (c, g) Scatter plots of seizure dissimilarities vs. duration distances, along with the  
 976 Spearman correlation,  $\rho$ , between the two measures. (d, h) For each subject, permutation tests  
 977 yielded a distribution of 10,000 correlation values that described the expected correlation if there  
 978 were no relationship between seizure dissimilarities and duration distances. The  $p$ -value of the  
 979 association was equal to the proportion of times a correlation value greater than or equal to the  
 980 observed correlation (vertical bar) was seen in the distribution. The colour of the vertical bar  
 981 indicates whether the association between seizure dissimilarities and duration distances was  
 982 significant (blue = significant, grey = not significant after false discovery rate correction). (i) Dot  
 983 plot showing the range of correlations between seizure dissimilarities and duration distances across

- 984 all subjects. Each marker represents a subject (square = human subject, circle = canine subject,  
985 blue = significant, grey = not significant after false discovery rate correction).

986

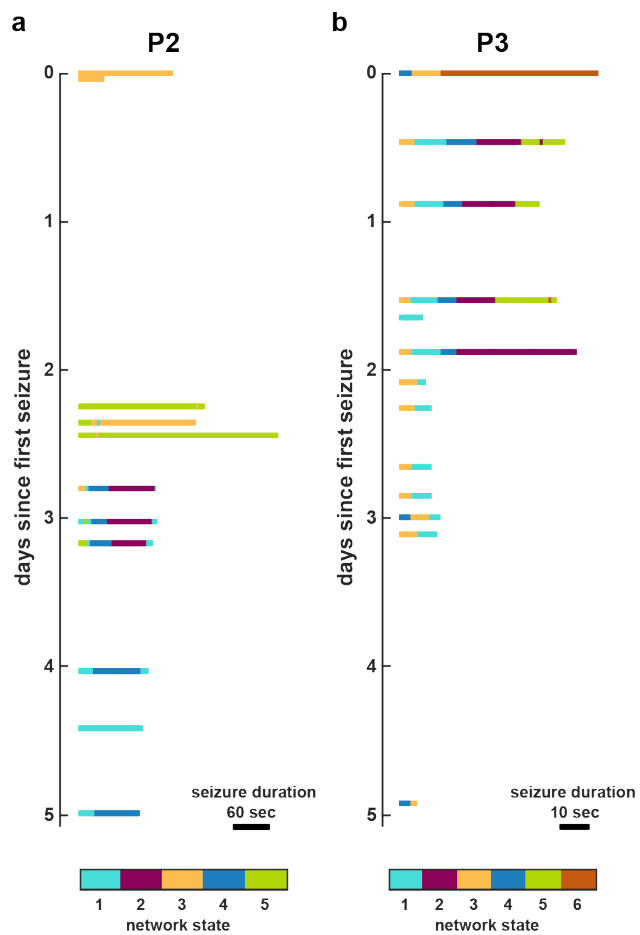

987

988

989 **Fig. 6: Temporal distribution of seizure dynamics in example subjects.** The seizure state  
990 progressions of subjects P2 (a) and P3 (b) are plotted in the order of their occurrence. The vertical  
991 distance between seizure progressions is proportional to the amount of time elapsed between  
992 seizures.

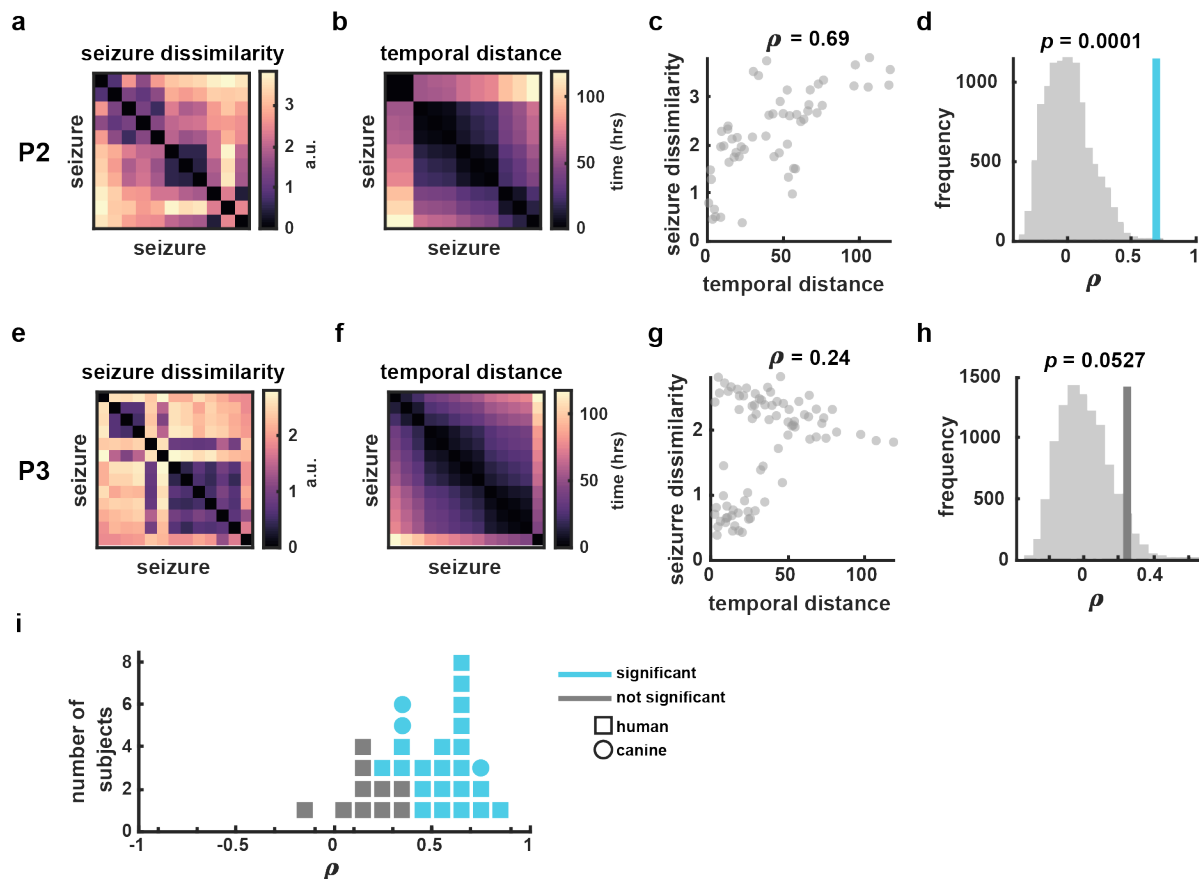

993

994

995 **Fig. 7: Comparison of seizure dissimilarities and temporal distances.** The comparison of  
 996 seizure dissimilarities and temporal distances is shown for subjects P2 (a-d) and P3 (e-h), along  
 997 with results across all subjects (i). Colour and marker coding is the same as in Fig. 5. (a, e) Seizure  
 998 dissimilarity matrices, summarising differences in seizure network dynamics within each subject  
 999 (same as in Fig. 3 and 5). (b, f) Temporal distance matrices. Each entry corresponds to the amount  
 1000 of time elapsed between the onsets of a pair of seizures. (c, g) Scatter plots of seizure dissimilarities  
 1001 vs. temporal distances, along with the Spearman correlation,  $\rho$ , between the two measures. (d and  
 1002 h) Permutation test results for each subject. See Fig. 5 for a description of the permutation test  
 1003 and  $p$ -values. (i) Dot plot showing the range of correlations between seizure dissimilarities and  
 1004 duration distances across all subjects, as well as whether each relationship was significant after false  
 1005 discovery rate correction.

1006



1007

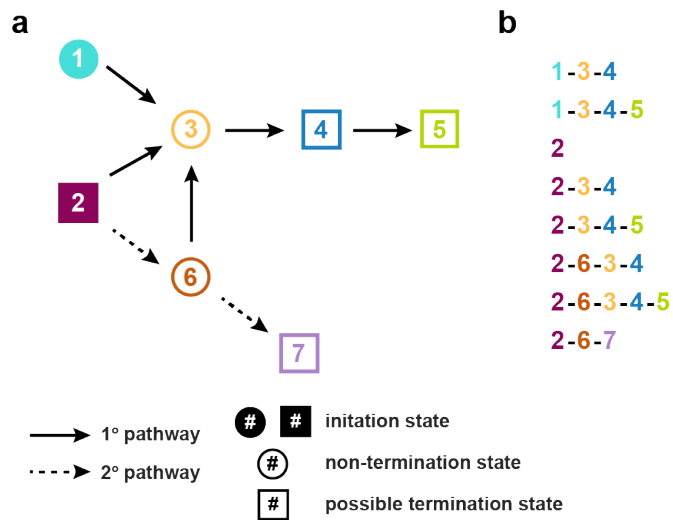

1008

1009 **Fig. 8. Hypothesised model for variability in seizure pathways.** (a) Diagram of possible  
 1010 seizure pathways, which are described as transitions between seven network states. For simplicity,  
 1011 we use a schematic of seizure progression that provides examples of seizure variability features  
 1012 observed in our data. States that are filled in (states 1 and 2) are possible initiation states in the  
 1013 seizure pathway. Dotted arrows represent secondary transitions that are less likely to occur. Square  
 1014 states indicate points in the progression where the seizure may terminate. While some transitions  
 1015 are deterministic (e.g., state 3 always progresses to state 4), other states are decision points at  
 1016 which variability is introduced into the seizure progression. Variability can be introduced by  
 1017 alternative onsets (e.g., onset states 1 and 2, which can both lead to state 3), different possible  
 1018 progressions (e.g., state 6 can progress to either state 3 or 7), and potential termination points (e.g.,  
 1019 state 4 can terminate the seizure or progress to state 5). (b) Potential seizures arising from these  
 1020 seizure pathways, demonstrating variability in state onset, state progression, state termination, and  
 1021 state inclusion. All these types of variability are observed in our cohort. Note that the last three  
 1022 progressions, beginning with the state sequence (2, 6), will be rarer since these transitions are less  
 1023 likely.
