1 **Seizure pathways change on circadian and slower timescales in individual patients with**  
2 **focal epilepsy**

3

4 Gabrielle M Schroeder<sup>1</sup>, Beate Diehl<sup>2</sup>, Fahmida A Chowdhury<sup>2</sup>, John S Duncan<sup>2</sup>, Jane de Tisi<sup>2</sup>,  
5 Andrew J Trevelyan<sup>3</sup>, Rob Forsyth<sup>3</sup>, Andrew Jackson<sup>3</sup>, Peter N Taylor<sup>1,2,3</sup>, Yujiang Wang<sup>1,2,3</sup>

6

7 1. Interdisciplinary Computing and Complex BioSystems Group, School of Computing  
8 Science, Newcastle University, UK

9 2. UCL Queen Square Institute of Neurology, Queen Square, London WC1N 3BG, UK

10 3. Faculty of Medical Sciences, Newcastle University, UK

11

12

13 **Abstract**

14 Personalised medicine requires that treatments adapt to not only the patient, but changing factors  
15 within each individual. Although epilepsy is a dynamic disorder that is characterised by  
16 pathological fluctuations in brain state, surprisingly little is known about whether and how seizures  
17 vary in the same patient. We quantitatively compared within-patient seizure network dynamics  
18 using intracranial recordings of over 500 seizures from 31 patients with focal epilepsy (mean 16.5  
19 seizures/patient). In all patients, we found variability in seizure paths through the space of possible  
20 network dynamics, producing either a spectrum or clusters of different dynamics. Seizures with  
21 similar pathways tended to occur closer together in time, and a simple model suggested that seizure  
22 pathways change on circadian and/or slower timescales in the majority of patients. These temporal  
23 relationships occurred independent of whether the patient underwent antiepileptic medication  
24 reduction. Our results suggest that various modulatory processes, operating at different timescales,  
25 shape within-patient seizure dynamics, leading to variable seizure pathways that may require  
26 tailored treatment approaches.

## 27 Introduction

28

29 Focal epilepsy is characterised by spontaneous, recurrent seizures that arise from localised cortical  
30 sites (1). An unresolved question is how much seizure dynamics can vary in individual patients.  
31 Past studies suggest that seizures within a single patient share common features (2–6) and progress  
32 through a similar sequence (7), or “characteristic pathway” (8), of neural dynamics. However, there  
33 is also evidence that seizure dynamics vary in some patients. Clinically, there may be different types  
34 of seizure dynamics in patients with multiple seizure onset sites (9), and long-term  
35 electroencephalographic (EEG) recordings suggest that a subset of patients have multiple seizure  
36 populations with distinct dynamics (8, 10–12). Ictal onset patterns (13, 14), the extent of seizure  
37 spread (15, 16), and seizure recruitment patterns (17) can also differ in the same patient. This  
38 variability may arise from fluctuations in the underlying brain state (18–22), suggesting that  
39 background neural dynamics affect not only seizure likelihood (19, 23), but also seizure *features*.  
40 Crucially, a given treatment may only address a subset of a patient’s seizure dynamics: for example,  
41 a single neurostimulation protocol may not control the complete repertoire of seizures (18) and a  
42 single prediction algorithm may fail to forecast all seizures (10, 12, 24). Consequently, seizure  
43 variability has important implications for clinical management in these patients.

44

45 To design optimal and comprehensive treatments, we therefore need to understand the prevalence  
46 and characteristics of within-patient seizure variability. Is seizure variability present in all patients,  
47 and, if so, what form does the variability take? Do within-patient seizures cluster into groups with  
48 distinct dynamics? How are different seizure dynamics distributed in time?

49

50 To answer these questions, we must objectively quantify seizure similarity. This task is challenging  
51 due to the complexity of seizure dynamics: a variety of spatiotemporal features change  
52 independently during seizure evolution. Although some studies have quantitatively compared  
53 within-patient seizures (25–30), the current gold standard remains visual inspection of ictal EEG  
54 by trained clinicians. This latter approach is time-consuming and subjective, and can miss  
55 important features, including functional network interactions, that are difficult to detect visually.  
56 These functional network dynamics, also known as functional connectivity patterns, describe  
57 relationships between the activity recorded by different EEG channels. Temporal changes in  
58 network dynamics play important roles in seizure initiation, propagation, and termination (2, 22,  
59 31–40), in part due to dynamic changes in the connectivity of the seizure onset zone (7, 41–43).  
60 To fully understand how functional interactions support ictal processes, we must also determine

61 if multiple seizure pathways, representing different ictal network evolutions, can co-exist in an  
62 individual patient. Such diversity would reveal that the same neural regions can variably interact to  
63 produce a variety of pathological dynamics.

64

65 Our goal was to quantify and characterise within-patient variability in seizure pathways through  
66 network space. We visualised and compared the within-patient seizure network evolutions of  
67 human patients with focal epilepsy (recorded for 43-382 hrs). In total, we analysed the network  
68 evolutions of 511 seizures (average 16.5 seizures/patient), making our study the first large-scale  
69 examination of within-patient seizure variability. In each patient, we found variability in seizure  
70 network evolution, revealing that within-patient seizures are not well-represented by a single  
71 characteristic pathway. However, seizures can share parts or all of the same pathway, with recurring  
72 dynamical elements across seizures. Furthermore, we explored how seizure dynamics change over  
73 different timescales, providing novel insight into the temporal changes of within-patient seizures.  
74 Our analysis revealed that seizures change on circadian and/or slower timescales in each patient,  
75 suggesting that different modulatory processes shape seizure pathways.

76

77

## 78 **Results**

79

80 We analysed seizure network evolution in 31 human patients (511 seizures total, mean 16.5  
81 seizures/patient) with focal epilepsy who underwent continuous intracranial  
82 electroencephalographic (iEEG) recordings as part of presurgical evaluation. Patient details are  
83 provided in SI Appendix, Text S1. We first visualise seizure network dynamics and quantify the  
84 dissimilarity of within-subject seizure pathways through network space. Importantly, our analysis  
85 captures differences in network interactions during seizures, which do not necessarily correspond  
86 to anatomical differences in the location and spread of seizure activity. We then investigate the  
87 amount and form of this variability across patients, and explore how seizure dynamics change over  
88 time. Finally, we hypothesise how underlying processes occurring on different time scales could  
89 drive the observed changes in seizure pathways.

90

### 91 **Visualising and quantifying variability in within-patient seizure pathways**

92

93 Our first goal was to objectively compare within-patient seizure network dynamics. For each  
94 patient, we extracted the seizure iEEGs (Fig. 1A) and computed the sliding-window functional

95 connectivity, defined as band-averaged coherence in six frequency bands (Fig. 1B). Thus, each  
96 seizure time window was described by a set of six connectivity matrices that captured interactions  
97 between iEEG channels in each frequency band. We additionally normalised the magnitude of  
98 each connectivity matrix to focus on the evolving patterns of network interactions, rather than  
99 gross changes in the global level of coherence. The set of all possible connectivity patterns created  
100 a high-dimensional space, in which each location corresponded to a specific network  
101 configuration. As such, each time window could be represented by a high-dimensional data point,  
102 and the evolution of a seizure's network dynamics formed a pathway in this high-dimensional  
103 connectivity space. By transforming seizures in this manner, we framed our comparison of seizure  
104 dynamics as a comparison of seizure pathways (or trajectories) through the high-dimensional  
105 network space.

106

107 Due to the high dimensionality of this network space, it was infeasible to directly visualise seizure  
108 pathways. However, seizure pathways could be approximated in a two dimensional projection  
109 using multidimensional scaling (MDS), a dimensionality reduction technique that attempts to  
110 maintain the distances between high-dimensional data points in the lower dimensional space (Fig.  
111 1C). As such, this technique placed seizure time windows in the two-dimensional projection based  
112 on the similarity of their network configurations; each time window was represented by a single  
113 point, and points corresponding to time windows with more similar network dynamics were placed  
114 closer together. While imperfect, this approximation of the network space nonetheless provided  
115 an intuitive visualisation for comparing seizure pathways in the same patient. For example, in  
116 patient 931, the projection demonstrated that two seizures may follow approximately the same  
117 pathway (seizures 6 and 8), part of the same pathway (seizures 8 and 9), or completely distinct  
118 pathways (seizures 2 and 10) through the network space, in agreement with visual impressions of  
119 the EEG.

120

121 To quantify these visual observations, we developed a “seizure dissimilarity” measure that provides  
122 a “distance” between two seizures based on their pathways through network space. Importantly,  
123 our approach recognises similarities in seizure pathways, even if the seizures evolve at different  
124 rates, by first applying dynamic time warping (44) to each pair of seizure functional connectivity  
125 time courses (SI Appendix, Text S2). Dynamic time warping nonlinearly stretches each time series  
126 such that similar points are aligned, thus minimizing the total distance between the two time series.  
127 We then defined the dissimilarity between two seizures as the average difference between the  
128 seizure pathways across all warped time points. The seizure dissimilarity matrix then summarises

129 the dissimilarity between all pairs of seizure pathways in the same patient (Fig. 1D). In patient  
130 931, seizures with similar pathways therefore have a low dissimilarity (e.g., seizures 6 and 8,  
131 dissimilarity 0.49); seizures with distinct, distant pathways have high dissimilarity (e.g., seizures 2  
132 and 10, dissimilarity 3.21); and seizures with partially overlapping pathways have an intermediate  
133 level of dissimilarity (e.g., seizures 8 and 9, dissimilarity 1.75). Again, our measure of seizure  
134 dissimilarity agrees with intuitive comparisons of seizures based on visually assessing the iEEG  
135 (Fig. 1A) and MDS projections of the seizure pathways (Fig. 1C).

136

137 It is important to note that both seizure dissimilarity matrices and MDS projections are patient-  
138 specific: due to different electrode implantations, we cannot compare seizures across patients using  
139 these network features. However, because we normalise the magnitude of the functional  
140 connectivity, we can compare seizure dissimilarity values across patients, even if the patients have  
141 different numbers of recording electrodes. In the remainder of the paper, we will focus on the  
142 across patient results, while using patient 931's seizures as examples. The seizure variability analysis  
143 of all patients will be available on Zenodo (<http://dx.doi.org/10.5281/zenodo.3560736>) and  
144 summarised in SI Appendix, Text S3.

145

### 146 **Seizure variability is a common feature in all patients**

147

148 Using our measure of seizure dissimilarity, we compared seizure pathways through network space  
149 in each patient. We first determined if seizure variability was present in all patients. Fig. 2A shows  
150 the distribution of seizure dissimilarities in each patient, with patients sorted from lowest (patient  
151 934) to highest (patient I002 P006 D01) median dissimilarity. Note that each point corresponds  
152 to the difference in network dynamics of a *pair* of seizures, rather than a feature of a single seizure.  
153 From these distributions, it is apparent that all patients had variability in seizure network dynamics.  
154 Even in patients with more consistent seizures, such as patient 934, there were pairs of seizures  
155 with high dissimilarity, indicating dissimilar seizure pathways. Meanwhile, other patients, including  
156 patient 931, had varying levels of different dynamics, with only a few pairs of similar seizures.

157

158 Past studies have noted that some patients have populations of seizures with distinct features such  
159 as different onset sites (9, 11) or durations (8, 12). As such, we would expect the variability  
160 described in these studies to result from different, discrete seizure types coexisting in the same  
161 patient. We therefore tested if each of the patients in our cohort had multiple seizure types by  
162 clustering their seizures based on seizure dissimilarities (Fig. 2B; see Methods for details). Contrary

163 to our expectation, we found that the majority of patients (21 patients), including patient 931, did  
164 not have distinct types. Importantly, without a clear way to split their seizures into different types,  
165 the full diversity of their seizure dynamics could not be described by a few example seizures. Ten  
166 patients had two or more seizure clusters, although there was still variability in dynamics within  
167 most clusters (SI Appendix, Text S4), and the average amount of seizure variability was the same  
168 in patients with or without multiple seizure clusters (Fig. 2C) (two sample  $t$ -test,  $p = 0.68$ ). Thus,  
169 the presence or absence of different types of seizure dynamics does not indicate the average  
170 amount of seizure variability in each patient.

171

172 We also found that the observed variability was not solely explained by the presence of different  
173 clinical seizure types (subclinical, focal, or secondarily generalised seizures) (SI Appendix, Text S5).  
174 This finding was expected given that seizures of different clinical types can share similar dynamics,  
175 while seizures of the same clinical type may have dramatically different features (16, 45, 46).  
176 Additionally, we found no association between postsurgical seizure freedom and measures of  
177 seizure variability (SI Appendix, Text S6). Likewise, higher levels of seizure variability were not  
178 associated with a particular seizure onset site (SI Appendix, Text S6). These findings suggest that  
179 the level of seizure variability is not associated with certain patient pathologies or treatment  
180 outcomes; instead, other factors may be more crucial for determining the extent and form of the  
181 variability.

182

### 183 **Seizures with more similar pathways tend to occur closer together in time**

184

185 Many time-varying factors, such as sleep (21, 23, 45, 47, 48) and hormones (49–52), are thought  
186 to influence seizure likelihood and dynamics. Additionally, during presurgical monitoring,  
187 antiepileptic medication is reduced in many patients, impacting brain dynamics (53). We therefore  
188 explored whether there is a temporal structure to how seizure dynamics change over time in each  
189 patient. Fig. 3A shows the pathways of patient 931's seizures, as well as the time that each seizure  
190 occurred relative to the patient's first seizure. From this visualisation, we see that the pathways  
191 gradually migrated through network space as the recording progressed, creating the observed  
192 spectrum of network dynamics. Moreover, looking at the seizure timings, we also see that seizures  
193 with similar pathways, such as seizures 6-8, tended to occur close together in time.

194

195 To quantify this temporal relationship, we defined a “temporal distance” matrix as the amount of  
196 time elapsed between each pair of the patient's seizures (Fig. 3B). Patient 931's seizure dissimilarity

197 and temporal distance matrices have strikingly similar structures: groups of seizures with low  
198 dissimilarity tended to occur together in a relatively short time interval. In this patient, there was a  
199 strong and significant positive correlation between these features (Spearman's  $\rho = 0.69$ ,  $p = 0.001$ ,  
200 one-tailed Mantel test), indicating that seizures with more similar pathways tended to occur closer  
201 together in time.

202

203 Fig. 3C summarises the relationship between seizure dissimilarities and temporal distances across  
204 all patients. In almost all patients, there was a positive Spearman's correlation between seizure  
205 dissimilarities and temporal distances (range:  $-0.10 - 0.83$ , mean:  $0.45$ ). This association was  
206 significant in 21 patients (67.7%) after false discovery rate correction. In these patients, we also  
207 observed that the average level of dissimilarity tends to increase with the time between the two  
208 seizures (Fig. 3D). Interestingly, there was no association between whether antiepileptic  
209 medication was reduced and whether the correlation between seizure dissimilarities and temporal  
210 distances was significant ( $\chi^2$  test,  $p = 0.96$ ) (SI Appendix, Text S7). Therefore, although medication  
211 levels may affect seizure dynamics (9, 16, 54, 55), medication changes alone cannot explain the  
212 observed shifts in seizure pathways, suggesting that other temporal factors also play a role in  
213 shaping seizure features.

214

### 215 **Seizure pathways change on different timescales**

216

217 The observed temporal associations of seizure dissimilarities reflected gradual changes in seizure  
218 dynamics across the length of each recording. In other words, we observed relatively slow shifts  
219 in seizure pathways over the course of multiple days. However, we also hypothesised that seizure  
220 dynamics may change on shorter timescales due to, for example, circadian rhythms. Such rhythms  
221 would create timescale-dependent relationships between seizures; in particular, there would be a  
222 positive correlation between seizure dissimilarities and temporal distances on shorter timescales,  
223 but this association would be destroyed on longer timescales.

224

225 Therefore, to explore the possibility of different timescales of changes in seizure dynamics, we  
226 scanned the correlation between seizure dissimilarities and temporal distances on different  
227 timescales  $T$  ranging from 6 hrs to the longest amount of time between a seizure pair (Fig. 4A).  
228 For example, for  $T = 3$  days, we computed the correlation between seizure dissimilarities and  
229 temporal distances for all pairs of seizures that occurred within three days of each other. We refer  
230 to these sets of correlation as “temporal correlation patterns” of seizure dynamics. Fig. 4A shows

231 the temporal correlation patterns of patient 931's seizures. As we determined earlier, there was a  
232 positive correlation between seizure dissimilarities and temporal distances when all seizures were  
233 included in the computation ( $T = 5$  days) as a result of the observed gradual changes in seizure  
234 pathways. At shorter timescales, however, the temporal relationship fluctuates; for example, the  
235 correlation is relatively low at  $T = 1$  and 2.5 days, and higher at  $T = 0.75$  and 2.5 days. These  
236 fluctuations are signs of additional, timescale-dependent changes in seizure dynamics beyond the  
237 gradual changes.

238

239 To investigate how these temporal correlation patterns arise, we modelled different patterns of  
240 seizure variability and the corresponding temporal correlation patterns (Fig. 4B) (see Methods and  
241 SI Appendix, Text S8 for modelling details). Specifically, for each patient, we simulated sets of  
242 seizure dissimilarities arising from different levels of linear, circadian, and/or noisy dynamics based  
243 on predefined time-varying functions and the patient's seizure times. Linear changes in dynamics  
244 would correspond to the slower, gradual shifts in seizure dynamics; circadian changes represent  
245 dynamics modulated by circadian rhythms; and noisy changes allow for the influence of random  
246 fluctuations and intermittent factors. From these simulated dissimilarities, we computed simulated  
247 temporal correlation patterns. Based on the model parameters that most reliably reproduced the  
248 observed temporal correlation pattern, we categorised each patient's pattern of seizure variability  
249 as linear (Fig. 4B, left), circadian (Fig. 4B, middle), or linear + circadian (Fig. 4B, right). Crucially,  
250 this modelling approach allowed us to hypothesise how different patterns of seizure variability  
251 could interact with the patient's seizure timings to produce the observed temporal relationships  
252 between seizures.

253

254 In patient 931, example simulations using a single noise realisation demonstrated that these  
255 different underlying models could produce different temporal correlation patterns of seizure  
256 dynamics (Fig. 4B). A linear change in seizure dynamics produced a positive temporal relationship  
257 that is stronger at longer timescales. Higher levels of noise reduced this positive correlation at all  
258 timescales. Meanwhile, a circadian model only produced strong, positive temporal correlations at  
259 timescales shorter than one day. Finally, a combination of the linear and circadian factors created  
260 both the short-term temporal relationships and a positive temporal correlation at the longer  
261 timescales. Note that there were also some additional fluctuations in the temporal correlation  
262 patterns due to noisy changes in dynamics, especially at higher levels of noise, which will differ  
263 depending on the outcome of the noisy simulation.

264



265 Fig. 4C shows the underlying model (linear, circadian, or linear + circadian) most likely to underlie  
266 the observed temporal correlation patterns, as defined by the percentage of model simulations  
267 with matching temporal correlation patterns. We additionally required the selected model to 1)  
268 outperform noisy simulations alone, 2) clearly distinguish between the linear and circadian models,  
269 and 3) in the case of the linear + circadian model, clearly outperform one of the simpler models.  
270 Using these criteria, seventeen patients' temporal correlation patterns were best explained by the  
271 linear model, three by the circadian model, and seven by the linear + circadian model. Thus, most  
272 patients (77.4%) required a linear component to explain the observed changes in seizure dynamics,  
273 while (32.3%) of the temporal correlation patterns were well-matched by a model incorporating  
274 circadian dynamics. As before, different classifications of seizure dynamics were not associated  
275 with surgical outcomes (SI Appendix, Text S6) or whether the patient's medication was reduced  
276 during presurgical monitoring (SI Appendix, Text S7).

277  
278 Four patients' temporal correlation patterns could not be assigned to a model, either because the  
279 linear model and circadian model performed similarly (patient Study 038) or the best model did  
280 not outperform noise alone (patients Study 017, Study 033, and 1163). Notably, in some patients  
281 (Study 020, 756, 1196, and Study 017) only a small percentage of the simulations matched that  
282 observed temporal correlation patterns, indicating that reproducing the observed dynamics  
283 required specific patterns of noise. In these cases, other models may therefore provide a better  
284 explanation for the patient's changes in seizure dynamics. In particular, many of these patients had  
285 strong positive correlations at a timescales longer than one day, but less than the length of the  
286 recording, suggesting multi-day fluctuations in seizure dynamics.

## 287 Discussion

288

289 We have quantified variability in seizure network dynamics within individual human patients with  
290 focal epilepsy, revealing that within-patient seizures are neither deterministic nor comprehensively  
291 represented by a single dynamical pathway. Contrary to our expectation, most patients had a  
292 spectrum of seizure dynamics, rather than distinct seizure populations. Interestingly, seizure  
293 network dynamics change over time in most patients, with more similar seizures tending to occur  
294 closer together in time. Our modelling results indicate that in most patients, a combination of fast  
295 (i.e. circadian) and/or slow changes in seizure pathways may underlie the observed variability,  
296 suggesting that factors operating on different timescales modulate within-patient seizure dynamics.

297

298 We investigated variability in seizure functional network evolution due to the importance of  
299 network interactions in ictal processes (2, 7, 22, 31, 33–43) and build on previous work by  
300 demonstrating within-patient variability in these pathological network dynamics. However, the  
301 framework we present could easily be adapted to compare other features that highlight different  
302 aspects of seizure dynamics. For example, a univariate feature that captures the amplitude and  
303 frequency of ictal discharges may be better suited for comparing the involvement of different  
304 channels, similar to how clinicians visually compare EEG traces. Meanwhile, comparisons of  
305 parameter time courses, derived using model inversion (8, 56, 57), could reveal different patterns  
306 of changes in the neural parameters underlying a patient’s seizures. Finally, due to patient-specific  
307 recording layouts, we focused on comparing seizure dynamics within individual patients. However,  
308 comparing seizures across patients, either using spatially-independent features or common  
309 recording layouts, in future studies could uncover common classes of pathological dynamics (8,  
310 58).

311

312 To quantify within-patient variability in seizure pathways, we developed a “seizure dissimilarity”  
313 measure that addresses the challenges of comparing diverse spatiotemporal patterns across  
314 seizures. A few previous studies have attempted to quantitatively compare seizure dynamics using  
315 either univariate (26, 27, 29, 30) or network (25, 28) features computed from scalp or intracranial  
316 EEG. These earlier dissimilarity measures were based on edit distance, which captures how many  
317 replacements, insertions, and deletions are required to transform one sequence into another.  
318 Importantly, the insertion cost increases the dissimilarity of similar seizures with different rates of  
319 progression. Although previous work suggested lowering seizure dissimilarity in such scenarios  
320 (30), to our knowledge, our dynamic time warping approach provides the first measure of seizure

321 dissimilarity that does not penalise temporal variability between otherwise similar seizures. Despite  
322 this difference, those past studies also reported both common and disparate dynamics across  
323 within-patient seizures; however, their analysis was limited to a small number of patients and/or  
324 seizures per patient. Our work provides novel insight into the prevalence and characteristics of  
325 seizure variability by analysing over 500 seizures across thirty-one patients. Finally, we expand on  
326 previous work by using seizure dissimilarity for downstream analysis, including clustering seizures  
327 and describing temporal changes in seizure dynamics.

328

329 Previous work has found that within-patient seizures have similar dynamics (2–8), although  
330 variability may be introduced through different rates of progression (4, 59) or early termination in  
331 the seizure pathway (6, 8). In our cohort, we observed that subsets of within-patient seizures follow  
332 approximately the same dynamical pathway through network space, and such similar groups of  
333 seizures likely underlie these past findings. However, we also found that the complete repertoire  
334 of within-patient seizure network dynamics is poorly characterised by a single, characteristic  
335 pathway. Notably, we also found that a patient with different seizure dynamics does not necessarily  
336 have distinct populations of seizures. We therefore propose a model in which various decision  
337 points, existing on the framework of potential seizure pathways, produce a repertoire of seizure  
338 evolutions (SI Appendix, Text S9). The number and location of these decision points would also  
339 explain why some patients have a spectrum of seizure dynamics: a larger number of “forks” in  
340 seizure pathways would produce a series of small changes between different seizures, rather than  
341 distinct seizure types. Future studies can map these potential seizure pathways and the factors  
342 shaping how individual seizures evolve.

343

344 The crucial question is then how these different seizure pathways arise from the same neural  
345 substrate. In theory, a range of changes before or during the seizure can affect its network  
346 progression. We hypothesise that spatiotemporal changes in the interictal neural state produce  
347 seizures with different characteristics. Past studies suggest that neural excitability (19, 55, 60),  
348 inhibition (59), and network interactions (22, 61) influence certain spatiotemporal seizure features,  
349 such as the rate and extent of seizure propagation. These changes in brain state may be driven by  
350 various factors, including sleep (21, 45, 47), hormones (49–52), and medication (53). Recently,  
351 prolonged recordings of patients with focal epilepsy have revealed that the rates of epileptiform  
352 discharges and seizures fluctuate according to both circadian and patient-specific multidien  
353 (approximately weekly to monthly) cycles (48, 62). An intriguing possibility is that the same factors  
354 that rhythmically modulate seizure likelihood may also influence seizure dynamics. Consistent with

355 this hypothesis, we found that the majority of observed temporal patterns of seizure variability  
356 were well-explained by models incorporating circadian and/or linear changes in seizure dynamics.  
357 In particular, the linear component of the model may reflect gradual changes in dynamics on  
358 slower timescales, ranging from weeks to months. These simple models provided an initial  
359 hypothesis for the observed patterns of changes in seizure dynamics. Some patients seizure  
360 patterns may be better explained by more complex models that capture different dynamics, such  
361 as multistability or multidien cycles. Ultimately, it is likely that various factors, with differential  
362 effects on seizure dynamics, interact to produce the observed repertoire of seizure network  
363 evolutions. Analysing within-patient seizure variability in long-term recordings could provide  
364 additional insight into patterns of temporal changes in seizure dynamics.

365

366 Notably, a large number of the patients in our study underwent antiepileptic medication reduction  
367 as part of pre-surgical monitoring, making it difficult to disentangle the effects of changing drug  
368 levels from other potential slow-varying modulators of seizure dynamics. Changes in antiepileptic  
369 medication can impact neural excitability (63–65), and medication tapering increases seizure  
370 likelihood in most patients (16, 66); however, it is controversial whether it also affects seizure  
371 patterns (9, 16, 54, 66). In some cases, it appears that medication tapering reveals latent seizure  
372 pathways that are suppressed by medication (9) or allows existing pathways to further progress  
373 (e.g., the secondary generalisation of typically focal seizures) (16). It is possible that the impact of  
374 medication reduction on seizure dynamics is drug-, patient-, and dose-dependent, and may  
375 ultimately depend on how well the medication controls neuronal excitability (55). However,  
376 medication changes alone cannot account for the observed seizure variability in our cohort, as we  
377 observed temporal associations of seizure dynamics in patients that did not undergo medication  
378 reduction. In future work, associating medication levels with differences in seizure dynamics could  
379 help untangle the different factors shaping seizure dynamics.

380

381 Another confounding factor in our data is that the surgical implantation itself could artificially alter  
382 seizure dynamics. Using chronic recordings of epileptic canines, Ung *et al.* (67) found variability in  
383 seizure onset and interictal burst dynamics, with the most stable dynamics emerging approximately  
384 a few weeks after electrode implantation. In agreement with their work, we found that earlier  
385 seizure types often recur later in the recording, making it unlikely that gradual changes in the  
386 recording quality or an acute reaction to the surgery underlie the observed variability. Instead, Ung  
387 *et al.* hypothesised that seizure variability results from transient, atypical dynamics as the brain  
388 recovers from surgery, with later dynamics representing a truer epileptic network. Other stressors,

389 such as medication withdrawal, could similarly elicit abnormal dynamics. Nevertheless, a large  
390 number of our patients had good surgical outcomes, suggesting that their recorded seizures  
391 accurately represented their epileptic networks. Additionally, clinicians often note that patients  
392 have typical seizures during iEEG recordings, as compared to preimplantation reports, despite the  
393 effects of surgery and medication withdrawal (16). As such, the observed seizure dynamics in our  
394 cohort may be part of their usual repertoires of seizure dynamics, even if some dynamics are only  
395 elicited by strong stressors. Further analysis in chronic human recordings is needed to determine  
396 whether and how seizure pathways vary in a more naturalistic setting.

397

398 Contrary to the expectation that high levels of seizure variability may worsen surgical outcomes,  
399 we found no association between these patient features. It may be that only some types of  
400 variability, such as multifocal (9) or secondarily generalised (68) seizures, impact the likelihood of  
401 seizure freedom following surgery. Importantly, variability in the seizure onset network state does  
402 not indicate that a patient has multifocal seizures, as different network configurations can be  
403 associated with the same apparent ictal onset zone. Additionally, variability in seizure dynamics  
404 may not be inherently deleterious, as long as it is observed and accounted for when planning the  
405 surgical resection. Indeed, due to the short presurgical monitoring time and limited spatial coverage  
406 of the recording electrodes, some potential seizure pathways may not have been captured (11, 67),  
407 leading us to underestimate the level of variability in some patients.

408

409 Although the amount of seizure variability was not associated with post-surgical seizure freedom,  
410 it may have implications for clinical treatments. First, regardless of the source of the observed  
411 seizure variability, the different seizure dynamics observed during presurgical monitoring provide  
412 crucial information for guiding surgical resection. For example, recent studies suggest that seizure  
413 network properties can help identify epileptogenic tissue (7, 69, 70); however, we must determine  
414 if seizures with different network evolutions provide equivalent localisation information. Seizure  
415 variability may also have implications for seizure prediction. In particular, in that same patient,  
416 seizures with different dynamics may have distinct preictal signatures, making seizure prediction  
417 more difficult (10, 12). A successful seizure prediction algorithm would either need to recognise  
418 multiple signatures or find common features among the disparate preictal dynamics. Finally,  
419 neurostimulation offers a promising new approach for controlling seizures; however, in rodent  
420 models, the effectiveness of a given stimulation protocol depends on the preictal brain state (18).  
421 Thus, such interventions may need to recognise and adapt to the specific characteristics of each  
422 seizure type in order to control all seizure dynamics. Importantly, our cohort was limited to

423 patients with medication refractory focal epilepsy who were candidates for surgical resection. The  
424 characteristics and clinical implications of seizure variability may be different in other patient  
425 cohorts.

426

427 In summary, we have shown that there is within-patient variation in seizure network dynamics in  
428 patients with focal epilepsy. Temporal changes in seizure dynamics suggest that a combination of  
429 circadian and slow-varying factors shape these seizure pathways, perhaps by modulating the  
430 background brain state. Further research is needed to determine whether and how preictal  
431 dynamics shape seizure pathways. Uncovering these mechanisms could provide novel approaches  
432 for predicting and controlling seizures that are tailored to the complete repertoire of pathological  
433 neural dynamics in each patient.

## 434 **Materials and methods**

435

436 **Patient selection and data acquisition:** This work was a retrospective study that analysed  
437 seizures from 13 patients from the Mayo Clinic and the Hospital of the University of  
438 Pennsylvania (available on the IEEG Portal, [www.ieeg.org](http://www.ieeg.org) (71, 72)) and 18 patients from the  
439 University College London Hospital (UCLH) who were diagnosed with refractory focal  
440 epilepsy and underwent presurgical monitoring. Patients were selected without reference to  
441 cause or other characteristics of their pathology. All IEEG Portal patients gave consent to have  
442 their anonymised iEEG data publicly available on the International Epilepsy Electrophysiology  
443 Portal ([www.ieeg.org](http://www.ieeg.org)) (71, 72). For the UCLH patients, their iEEG was anonymised and  
444 exported, and the anonymised data was subsequently analysed in this study under the approval  
445 of the Newcastle University Ethics Committee (reference number 6887/2018).

446

447 For each patient, the placement of the intracranial electrodes was determined by the clinical  
448 team, independent of this study. Ictal segments were identified and extracted for the analysis  
449 based on clinical seizure markings. To be included in the study, each patient was required to  
450 have had at least six seizures suitable for the analysis. This threshold was chosen to allow  
451 examination of seizure variability in a broad cohort of subjects, while still ensuring that enough  
452 seizures were observed to draw conclusions about the forms, types, and characteristics of  
453 seizure variability in each subject. Seizures were excluded from the analysis if they did not  
454 have clear electrographic correlates (with clear onset and termination), if they were triggered  
455 by/occurred during cortical stimulation, if they had noisy segments, or if they had large missing  
456 segments. Periods of status epilepticus and continuous epileptiform discharges were also  
457 excluded. However, electrographic seizures without clinical correlates were included in the  
458 analysis. Additional information about each subject and the analysed seizures is shown in SI  
459 Appendix, Text S1.

460

461 **iEEG preprocessing:** For each patient, if different seizures were recorded at multiple sampling  
462 frequencies, all of the recordings were first downsampled to the lowest sampling frequency.  
463 Noisy channels were then removed based on visual inspection. In the remaining channels, short  
464 sections of missing values were linearly interpolated. These sections of missing values were  
465  $<0.05$  s with the exception of one segment in seizure 2 of patient “Study 020”, which was  
466 0.514 s. All channels were re-referenced to a common average reference. Each channel’s time  
467 series was then bandpass filtered from 1-150 Hz (4<sup>th</sup> order, zero-phase Butterworth filter). To  
468 remove line noise, the time series were additionally notch filtered (4<sup>th</sup> order, 2 Hz width, zero-

469 phase Butterworth filter) at 60 and 120 Hz (IEEG Portal patients) or 50, 100, and 150 Hz  
470 (UCLH patients).

471

472 **Computing functional connectivity:** To compute the time-varying functional connectivity of  
473 each seizure, a 10 s sliding window, with 9 s overlap between consecutive windows, was  
474 applied to each preprocessed ictal time series. The same sliding window parameters have  
475 previously been used to estimate time-varying coherence in ictal iEEG data (73). For each  
476 window, the coherence between each pair of iEEG channels was computed in six different  
477 frequency bands (delta 1-4 Hz, theta 4-8 Hz, alpha 8-13 Hz, beta 13-30 Hz, gamma 30-80 Hz,  
478 high gamma 80-150 Hz). The coherence in each frequency band was computed using band-  
479 averaged coherence, defined as

$$480 \quad C_{i,j}(f) = \frac{|\sum_{f=f_1}^{f_2} P_{i,j}(f)|^2}{\sum_{f=f_1}^{f_2} P_{i,i}(f) \sum_{f=f_1}^{f_2} P_{j,j}(f)}$$

481 where  $f_1$  and  $f_2$  are the lower and upper bounds of the frequency band,  $P_{i,j}(f)$  is the cross-  
482 spectrum density of channels  $i$  and  $j$ , and  $P_{i,i}(f)$  and  $P_{j,j}(f)$  are the autospectrum densities of  
483 channels  $i$  and  $j$ , respectively. In each window, channel auto-spectrums and cross-spectrums  
484 were calculated using Welch's method (2 s sliding window with 1 s overlap).

485

486 Thus, in a patient with  $n$  iEEG channels, the functional connectivity of each time window was  
487 described by six symmetric, non-negative,  $n \times n$  matrices, in which each entry  $(i,j)$  gives the  
488 coherence between channels  $i$  and  $j$  in the given frequency band. Each matrix was then written  
489 in vector form by re-arranging the upper-triangular, off-diagonal elements into a single column  
490 vector of length  $(n^2 - n)/2$ . Each vector was then normalised so that the  $L1$  norm (i.e., sum of  
491 all elements) was 1, thus ensuring that differences between connectivity vectors captured a  
492 change in connectivity pattern rather than gross changes in global levels of coherence. This  
493 normalisation step also allowed the magnitude of seizure dissimilarities to be compared across  
494 patients with different numbers of electrodes. For each time window, the six connectivity  
495 vectors were then vertically concatenated together, forming a single column vector of length  
496  $6 \cdot (n^2 - n)/2$ . Each patient's ictal connectivity vectors were subsequently horizontally  
497 concatenated together to form a matrix  $V$  containing  $6 \cdot (n^2 - n)/2$  features and  $m$  observations,  
498 where  $m$  is the total number of ictal windows across all seizures.

499

500 **Dimensionality reduction and visualisation:** Small fluctuations in the functional connectivity  
501 due to noise would create a high baseline dissimilarity between seizures. Therefore, to reduce



502 noise in the connectivity matrices, non-negative matrix factorization (NMF) (74) was used to  
503 approximately factor each patient's ictal time-varying connectivity matrix  $V$  into two non-  
504 negative matrices,  $W$  and  $H$ , such that  $V \approx W \times H$  (details provided in SI Appendix, Text S10).  
505 The matrix  $W$  contained patient-specific basis vectors, each of which had  $6*(n^2 - n)/2$  features  
506 that captured a pattern of connectivity across all channels and frequency bands. Each original  
507 ictal time window was summarised as an additive combination of these basis vectors, with the  
508 coefficients matrix  $H$  giving the contribution of each basis vector to each time window. These  
509 factorisations were patient-specific since the basis vector features depended on the iEEG  
510 electrode layout in each patient. The optimal number of basis vectors,  $r$ , was determined using  
511 stability NMF (75).

512

513 For each patient the selected factorisation was then used to create  $V^* = W \times H$ , a lower-rank  
514 approximation of the original time-varying seizure functional connectivity (SI Appendix, Text  
515 S10). This return to the original feature space is necessary since NMF basis vectors are not  
516 orthogonal, and distances in NMF basis vector space are therefore not equivalent to distances  
517 in feature space. Each reconstructed connectivity vector was then re-normalised to have an  $L1$   
518 norm of 1, ensuring that differences in reconstruction accuracy did not affect the distances  
519 between different ictal timepoints. To visualise the connectivity vectors of patient 931's  
520 seizures in Fig. 1C, all time seizures windows were projected into a two-dimensional  
521 embedding using multidimensional scaling (specifically, Sammon mapping) based on their  $L1$   
522 (cityblock) distances in the high-dimensional reconstructed feature space.

523

524 **Computing seizure dissimilarities:** Following the NMF-based reconstruction of the seizure  
525 connectivity, the network evolution of each seizure was described by a multivariate time series  
526 with  $6*(n^2 - n)/2$  features. To compare network evolutions across within-patient seizures, a  
527 "seizure dissimilarity matrix" was created for each patient. Each pair of seizure functional  
528 connectivity time series was first warped using dynamic time warping, which stretches each  
529 time series such that the total distance between the two time series is minimised (SI Appendix,  
530 Text S2). This step ensures that 1) similar network dynamics of the two seizures are aligned,  
531 and 2) the warped seizures are the same length. We chose to minimise the  $L1$  distance between  
532 each pair of seizures, as this metric provides a better measure of distances in high-dimensional  
533 spaces (76).

534

535 Following dynamic time warping, the  $L1$  distance between the pair of warped time series was  
536 computed, resulting in a vector of distances capturing the dissimilarity in the seizures' network

537 structures at each time point. The “seizure dissimilarity” between the two seizures was defined  
538 as the average distance across all warped time points. The seizure dissimilarity matrix contains  
539 the dissimilarities between all pairs of the patient’s seizures. Note that seizure dissimilarity is  
540 not a metric distance because the triangle equality does not necessarily hold; however, it  
541 performs similarly to alternative metric distances of seizure dissimilarity (SI Appendix, Text  
542 S11).

543

544 **Seizure clustering and cluster evaluation:** To identify groups of similar seizures in each  
545 patient, each patient’s seizures were hierarchically clustered by using the seizure dissimilarity  
546 matrix as input for an agglomerative hierarchical clustering algorithm, UPGMA (unweighted  
547 pair group method with arithmetic mean). The hierarchical clustering resulted in a dendrogram  
548 that summarised the similarity between the patient’s seizures. Note that the hierarchical  
549 clustering representation was an approximation of the seizure dissimilarities that forced all  
550 dissimilarities into a metric space.

551

552 The gap statistic (77), which compares the within-cluster dispersion of a given clustering  
553 relative to a reference (null) distribution, was then used to determine if optimal flat (i.e., non-  
554 hierarchical) clusters of seizures existed in each patient. In order to generate reference datasets,  
555 the patient’s seizures were first projected into Euclidean space using classical (Torgerson’s)  
556 multidimensional scaling (MDS). Note that this step differs from the earlier visualisation of  
557 seizure pathways, which projected seizure time points, rather than seizures themselves. Given  
558 the seizure dissimilarity matrix, MDS assigned a coordinate point to each seizure while  
559 attempting to preserve the specified dissimilarities between seizures. In order to most closely  
560 approximate the dissimilarities matrix, the seizures were projected onto the maximum possible  
561 number of dimensions; note, however, that like the hierarchical clustering, MDS also provided  
562 a metric approximation of the nonmetric dissimilarities. One thousand reference datasets were  
563 then generated by drawing coordinates from a uniform distribution placed over a box aligned  
564 with the principal components of the projected seizure data. Each reference dataset was  
565 hierarchically clustered by computing the distances between the coordinate points and applying  
566 the UPGMA algorithm. To test for flat clusters in the seizure data and reference datasets, the  
567 dendrograms were cut at different levels to generate 1, 2, ...  $s$  clusters, where  $s$  is the number  
568 of seizures. At each number of clusters  $k$ , the gap statistic  $G(k)$  was computed by comparing  
569 the within-cluster dispersion of the observed seizures and the reference datasets. The multiple  
570 reference datasets also allowed calculation of the standard error of the gap statistic at each  $k$ ,  
571  $SE(k)$ . The optimal number of clusters was defined as the smallest number of clusters where

572  $G(k) \geq G(k+1) - SE(k+1)$ , which identifies the point at which increasing the number of clusters  
573 provides little improvement in the clustering of the data (77).

574

575 **Comparison to temporal distances:** For each patient, we computed a “temporal distance  
576 matrix” containing the amount of time elapsed (measured in days) between the onset times of  
577 each pair of seizures. Spearman’s correlation was computed between the upper triangular  
578 elements of the seizure dissimilarity matrix and the temporal distance matrix of each patient.  
579 Since the distances in each matrix were not independent observations, the Mantel test (78) was  
580 used to determine the significance of each correlation. Briefly, the rows and columns of one  
581 matrix were randomly permuted 10,000 times. The correlation between the two sets of upper  
582 triangular elements was re-computed after each permutation, resulting in a distribution of  
583 correlation values that described the expected correlation if there were no relationship between  
584 seizure dissimilarities and temporal distances. The  $p$ -value of the association was then defined  
585 as the proportion of permuted correlation that were greater than or equal to the observed  
586 correlation. To correct for multiple comparisons, the Benjamini-Hochberg false discovery rate  
587 (FDR) correction (79) was applied to the set of  $p$ -values computed across all patients (31 total  
588 tests). The correlation was considered significant if the associated adjusted  $p$ -value was less  
589 than 0.05.

590

591 **Computing temporal correlation patterns:** To quantify how seizure dynamics change over  
592 different timescales in each patient, Spearman’s correlation between seizure dissimilarities and  
593 temporal distances was computed only for seizure pairs with temporal distances less than or  
594 equal to timescale  $T$ .  $T$  was scanned from 0.25 days up to the patient’s largest temporal distance  
595 in steps of 0.25 days. A timescale was excluded from the analysis if less than seven pairs of  
596 seizures occurred within the given timescale or if no new seizure pairs were added when the  
597 timescale was increased. The resulting set of correlations across various timescales were  
598 referred to as “temporal correlation patterns.”

599

600 **Modelling seizure dissimilarities and temporal correlation patterns:** To determine the  
601 underlying processes that could produce the observed temporal correlation patterns, changes  
602 in seizure dynamics were modelled using the functions

603  $f_l(t) = \frac{1}{7}t$  (a line with a slope of one per week)

604  $f_c(t) = \sin 2\pi t$  (a sine wave with a period of one day)

605  $f_n(t) \sim N(0,1)$  (Gaussian noise with a mean of zero and standard deviation of 1)

606 where  $t$  is time in days.

607

608 For each function, a simulated distance matrix  $D$  was then defined for the patients' seizures,  
609 with

$$610 \quad D(i, j) = |f(t_i) - f(t_j)|$$

611 where  $t_i$  is the time of seizure  $i$ ,  $t_j$  is the time of seizure  $j$ , and  $f(t)$  is the corresponding function.

612 The dissimilarity of the two seizures was then defined as

$$613 \quad \text{Diss}(i, j) = \sqrt{[lD_l(i, j)]^2 + [cD_c(i, j)]^2 + [nD_n(i, j)]^2}$$

614 where  $l$ ,  $c$ , and  $n$  are scalars controlling the relative contributions of the linear, circadian, and  
615 noise functions, respectively.

616

617 The relative contributions of the linear, circadian, and noise functions were scanned by varying  
618 the levels of  $l$ ,  $c$ , and  $n$ . At each set of values, seizure dissimilarities were simulated 1000 times  
619 using different noise realisations (and correspondingly changing the noise distance matrix,  $D_n$ ),  
620 and the resulting temporal correlation patterns were computed for each set of simulated  
621 dissimilarities. Note that because temporal correlation patterns only depend on the order of the  
622 dissimilarities, only the relative magnitudes of  $l$ ,  $c$ , and  $n$  affected the modelling results. A  
623 model was termed a "linear model" if  $c = 0$ , a "circadian model" if  $l = 0$ , and a "linear +  
624 circadian model" if  $l > 0$  and  $c > 0$ .

625

626 To determine if a patient's seizure dynamics could be categorised as linear, circadian, or linear  
627 + circadian, the simulated temporal correlation patterns were compared to the patient's  
628 observed temporal correlation pattern by computing the mean squared error (MSE) of each  
629 simulated pattern. Simulated temporal correlation patterns with  $\text{MSE} \leq 0.02185$  were defined  
630 as "good matches" to the observed dynamics. This threshold was chosen because it was the 5<sup>th</sup>  
631 percentile of the set of all MSEs, across all patients, and based on visual inspection of simulated  
632 temporal correlation patterns with different MSEs. The likelihood  $L$  of a given parameter set  
633 was then defined as the percentage of "good matches" produced by the 1000 noisy simulations  
634 of seizure dissimilarities at those parameter values. For each class of model (linear, circadian,  
635 or linear + circadian), the model's likelihood ( $L_l$ ,  $L_c$ , or  $L_{l+c}$ , respectively) was the highest  
636 likelihood among the model type's parameter sets, and the "best model" was the model with  
637 the highest likelihood.  $L_n$  was also defined as the highest likelihood of the parameter sets  
638 without any linear or circadian contributions ( $l = 0$ ,  $c = 0$ ,  $n > 0$ ).

639

640 This best model with likelihood  $L_{max}$  was then used to categorise the patient's dynamics if it  
641 outperformed all competing models. Specifically, we required that

- 642 1) The best model clearly outperform noise alone ( $L_{max} \geq 2L_n$ ); otherwise, the patient's  
643 dynamics were classified as other/indeterminate.
- 644 2) The performance of the linear model and circadian model were clearly distinguishable  
645 ( $L_l \geq 2L_c$  if the linear model was best;  $L_c \geq 2L_l$  if the circadian model was best);  
646 otherwise, the patient's dynamics were classified as other/indeterminate.
- 647 3) If the best model was linear + circadian, it clearly outperform the two simpler models  
648 ( $L_{l+c} \geq 2L_l$  and  $L_{l+c} \geq 2L_c$ ); otherwise, the patient's dynamics were classified as the  
649 simpler model (if one simpler model performed comparably by this criterion) or as  
650 other/indeterminate (if both simpler models performed comparably).

651 See SI Appendix, Text S8 for additional modelling details and the selected models for each  
652 patient.

653

#### 654 **Code and data availability**

655 All data was analysed using MATLAB version R2018b. To perform NMF, we used the  
656 Nonnegative Matrix Factorization Algorithms Toolbox, available at  
657 <https://github.com/kimjingu/nonnegfac-matlab/>, which implements the alternating  
658 nonnegative least squares with block principal pivoting algorithm (80, 81). For the remainder  
659 of the analysis, we used MATLAB implementations of standard algorithms (multidimensional  
660 scaling (Sammon mapping): `mdscale` (criterion "Sammon"), dynamic time warping: `dtw`,  
661 hierarchical clustering: `linkage`, Torgerson's multidimensional scaling: `cmdscale`, gap statistic:  
662 `evalclusters`, FDR correction: `mafdr`) or custom code. The iEEG time series of all IEEG Portal  
663 patients is available at [www.ieeg.org](http://www.ieeg.org). The NMF factorisation of each patient's data, along with  
664 the code for producing the primary downstream results (seizure dissimilarity matrices,  
665 clustering, and temporal analysis) and figures will be published on Zenodo  
666 (<http://dx.doi.org/10.5281/zenodo.3560736>).

667

#### 668 **Acknowledgements**

669 We thank Gerold Baier, Christoforos Papasavvas, Nishant Sinha, and the rest of the CNNP lab  
670 for discussions on the analysis and manuscript. We thank Andrew McEvoy and Anna  
671 Miserocchi for undertaking the epilepsy surgery at QS, and Catherine Scott, Roman Rodionov,  
672 and Sjoerd Vos for helping with data organisation.

673

674 The authors declare no conflict of interest.

675

676 **Author contributions**

677 Conceptualization and methodology: GMS and YW. Investigation: BD. Resources: BD,  
678 PNT, and YW. Data curation: GMS, BD, PNT and YW. Software, formal analysis,  
679 visualization: GMS. Validation: YW. Project administration: GMS, PNT, and YW.  
680 Supervision, funding acquisition: PNT and YW. Writing – original draft preparation: GMS.  
681 Writing – review and editing: all authors.

682

683 **Supplementary information**

684 Supplementary Information (Text S1-S11) is provided in the SI Appendix.  
685 Patient-specific visualisations and results will be provided on Zenodo  
686 (<http://dx.doi.org/10.5281/zenodo.3560736>).

687 **References**

688

- 689 1. Rosenow F, Lüders H (2001) Presurgical evaluation of epilepsy. *Brain* 124:1683–1700.
- 690 2. Kramer M a, et al. (2010) Coalescence and fragmentation of cortical networks during focal seizures. *J Neurosci*
- 691 30(30):10076–10085.
- 692 3. Schindler K, et al. (2011) Forbidden ordinal patterns of periictal intracranial EEG indicate deterministic dynamics in
- 693 human epileptic seizures. *Epilepsia* 52(10):1771–1780.
- 694 4. Truccolo W, et al. (2011) Single-neuron dynamics in human focal epilepsy. *Nat Neurosci* 14(5):635–641.
- 695 5. Schevon CA, et al. (2012) Evidence of an inhibitory restraint of seizure activity in humans. *Nat Commun* 3:1060.
- 696 6. Wagner FB, et al. (2015) Microscale spatiotemporal dynamics during neocortical propagation of human focal seizures.
- 697 *Neuroimage* 122:114–130.
- 698 7. Burns SP, et al. (2014) Network dynamics of the brain and influence of the epileptic seizure onset zone. *Proc Natl Acad*
- 699 *Sci* 111(49):E5321–E5330.
- 700 8. Karoly PJ, et al. (2018) Seizure pathways : a model-based investigation. *PLoS Comput Biol* 14(10):e1006403.
- 701 9. Spencer SS, Spencer DD, Williamson PD, Mattson RH (1981) Ictal effects of anticonvulsant medication withdrawal in
- 702 epileptic patients. *Epilepsia* 22:297–307.
- 703 10. Freestone DR, Karoly PJ, Cook MJ (2017) A forward-looking review of seizure prediction. *Curr Opin Neurol* 30:167–
- 704 173.
- 705 11. King-Stephens D, et al. (2015) Lateralization of mesial temporal lobe epilepsy with chronic ambulatory
- 706 electrocorticography. *Epilepsia* 56(6):959–967.
- 707 12. Cook MJ, et al. (2016) Human focal seizures are characterized by populations of fixed duration and interval. *Epilepsia*
- 708 57(3):359–368.
- 709 13. Alarcon G, Binnie CD, Elwes RDC, Polkey CE (1995) Power spectrum and intracranial EEG patterns at seizure onset
- 710 in partial epilepsy. *Electroencephalogr Clin Neurophysiol* 94:326–337.
- 711 14. Jiménez-Jiménez D, et al. (2015) Prognostic value of intracranial seizure onset patterns for surgical outcome of the
- 712 treatment of epilepsy. *Clin Neurophysiol* 126:257–267.
- 713 15. Karthick P, Tanaka H, Khoo H, Gotman J (2018) Prediction of secondary generalization from a focal onset seizure in
- 714 intracerebral EEG. *Clin Neurophysiol* 129:1030–1040.
- 715 16. Marciani MG, Gotman J (1986) Effects of drug withdrawal on location of seizure onset. *Epilepsia* 27(4):423–431.
- 716 17. Martinet LE, Ahmed OJ, Lepage KQ, Cash SS, Kramer MA (2015) Slow spatial recruitment of neocortex during
- 717 secondarily generalized seizures and its relation to surgical outcome. *J Neurosci* 35(25):9477–9490.
- 718 18. Ewell LA, et al. (2015) Brain state is a major factor in pre-seizure hippocampal network activity and influences success of
- 719 seizure intervention. *J Neurosci* 35(47):15635–15648.
- 720 19. Badawy R, Macdonell R, Jackson G, Berkovic S (2009) The peri-ictal state: Cortical excitability changes within 24 h of a
- 721 seizure. *Brain* 132:1013–1021.
- 722 20. Gliske S V., et al. (2018) Variability in the location of high frequency oscillations during prolonged intracranial EEG
- 723 recordings. *Nat Commun* 9:2155.
- 724 21. Bazil CW, Walczak TS (1997) Effects of sleep and sleep stage on epileptic and nonepileptic seizures. *Epilepsia* 38(1):56–
- 725 62.
- 726 22. Khambhati AN, Davis KA, Lucas TH, Litt B, Bassett DS (2016) Virtual cortical resection reveals push-pull network
- 727 control preceding seizure evolution. *Neuron* 91:1170–1182.
- 728 23. Karoly PJ, et al. (2017) The circadian profile of epilepsy improves seizure forecasting. *Brain* 140:2169–2182.
- 729 24. Takahashi H, Takahashi S, Kanzaki R, Kawai K (2012) State-dependent precursors of seizures in correlation-based
- 730 functional networks of electrocorticograms of patients with temporal lobe epilepsy. *Neurol Sci* 33:1355–1364.
- 731 25. Louis Door V, Caparos M, Wendling F, Vignal J-P, Wolf D (2007) Extraction of reproducible seizure patterns based on
- 732 EEG scalp correlations. *Biomed Signal Process Control* 2:154–162.

- 733 26. Wendling F, Bellanger J-J, Badier J-M, Coatrieux J-L (1996) Extraction of spatio-temporal signatures from depth EEG  
734 seizure signals based on objective matching in warped vectorial observations. *IEEE Trans Biomed Eng* 43(10):990–1000.
- 735 27. Wu L, Gotman J (1998) Segmentation and classification of EEG during epileptic seizures. *Electroencephalogr Clin*  
736 *Neurophysiol* 106:344–356.
- 737 28. Le Bouquin-Jeannès R, Wendling F, Faucon G, Bartolomei F (2002) Mise en correspondance de relations inter-  
738 structures lors de crises d'épilepsie. *ITBM-RBM* 23:4–13.
- 739 29. Wendling F, Shamsollahi MB, Badier JM, Bellanger JJ (1999) Time-frequency matching of warped depth-EEG seizure  
740 observations. *IEEE Trans Biomed Eng* 46(5):601–605.
- 741 30. Wendling F, Badier J, Chauvel P, Coatrieux J (1997) A method to quantify invariant information in depth-recorded  
742 epileptic seizures. *Electroencephalogr Clin Neurophysiol* 102:472–485.
- 743 31. Bartolomei F, et al. (2004) Pre-ictal synchronicity in limbic networks of mesial temporal lobe epilepsy. *Epilepsy Res*  
744 61:89–104.
- 745 32. Spencer SS (2002) Neural networks in human epilepsy : evidence of and implications for treatment. *Epilepsia* 43(3):219–  
746 227.
- 747 33. Rummel C, et al. (2013) A systems-level approach to human epileptic seizures. *Neuroinformatics* 11:159–173.
- 748 34. Schindler K, Leung H, Elger CE, Lehnertz K (2007) Assessing seizure dynamics by analysing the correlation structure  
749 of multichannel intracranial EEG. *Brain* 130:65–77.
- 750 35. Wendling F, Bartolomei F, Bellanger JJ, Bourien J, Chauvel P (2003) Epileptic fast intracerebral EEG activity: evidence  
751 for spatial decorrelation at seizure onset. *Brain* 126:1449–1459.
- 752 36. Schindler KA, Bialonski S, Horstmann M-T, Elger CE, Lehnertz K (2008) Evolving functional network properties and  
753 synchronizability during human epileptic seizures. *Chaos* 18:033119.
- 754 37. Schindler K, Elger CE, Lehnertz K (2007) Increasing synchronization may promote seizure termination: evidence from  
755 status epilepticus. *Clin Neurophysiol* 118:1955–1968.
- 756 38. Kramer MA, Cash SS (2012) Epilepsy as a disorder of cortical network organization. *Neuroscientist* 18(4):360–372.
- 757 39. Kramer MA, Kolaczyk ED, Kirsch HE (2008) Emergent network topology at seizure onset in humans. *Epilepsy Res*  
758 79:173–186.
- 759 40. Guye M, et al. (2006) The role of corticothalamic coupling in human temporal lobe epilepsy. *Brain* 129:1917–1928.
- 760 41. Khambhati AN, et al. (2015) Dynamic network drivers of seizure generation, propagation and termination in human  
761 neocortical epilepsy. *PLoS Comput Biol* 11(12):e1004608.
- 762 42. Khambhati AN, et al. (2017) Recurring functional interactions predict network architecture of interictal and ictal states  
763 in neocortical epilepsy. *eNeuro* 4(1):e0091–16.2017.
- 764 43. Bettus G, et al. (2008) Enhanced EEG functional connectivity in mesial temporal lobe epilepsy. *Epilepsy Res* 81:58–68.
- 765 44. Sakoe H, Seibi C (1978) Dynamic programming algorithm optimization for spoken word recognition. *IEEE Trans*  
766 *Acoustics, Speech, Signal Process* ASSP-26(1):43–49.
- 767 45. Sinha S, Brady M, Scott CA, Walker MC (2006) Do seizures in patients with refractory epilepsy vary between  
768 wakefulness and sleep? *J Neurol Neurosurg Psychiatry* 77:1076–1078.
- 769 46. Fisher RS, et al. (2017) Operational classification of seizure types by the International League Against Epilepsy: position  
770 paper of the ILAE Commission for Classification and Terminology. *Epilepsia* 58(4):522–530.
- 771 47. Bazil CW (2018) Seizure modulation by sleep and sleep state. *Brain Res* 1703:13–17.
- 772 48. Baud MO, et al. (2018) Multi-day rhythms modulate seizure risk in epilepsy. *Nat Commun* 9(88):1–10.
- 773 49. Harden CL, Pennell PB (2013) Neuroendocrine considerations in the treatment of men and women with epilepsy.  
774 *Lancet Neurol* 12:72–83.
- 775 50. Reddy DS, Rogawski MA (2013) Neurosteroids — endogenous regulators of seizure susceptibility and role in the  
776 treatment of epilepsy. *Jasper's Basic Mechanisms of the Epilepsies*, eds Noebels JL, Avoli M, Rogawski MA, Olsen RW,  
777 Delgado-Escueta A V (National Center for Biotechnology Information (US), Bethesda, MD), pp 984–1002. 4th Ed.
- 778 51. Taubøll E, Sveberg L, Svalheim S (2015) Interactions between hormones and epilepsy. *Seizure* 28:3–11.



- 779 52. den Heijer JM, et al. (2018) The relation between cortisol and functional connectivity in people with and without stress-  
780 sensitive epilepsy. *Epilepsia* 59:179–189.
- 781 53. Meisel C, et al. (2015) Intrinsic excitability measures track antiepileptic drug action and uncover increasing/decreasing  
782 excitability over the wake/sleep cycle. *Proc Natl Acad Sci* 112(47):14694–14699.
- 783 54. Engel JJ, Crandall PH (1983) Falsely localising ictal onsets with depth EEG telemetry during anticonvulsant withdrawal.  
784 *Epilepsia* 24:344–355.
- 785 55. Napolitano CE, Orriols MA (2013) Changing patterns of propagation in a super-refractory status of the temporal lobe.  
786 Over 900 seizures recorded over nearly one year. *Epilepsy Behav Case Reports* 1:126–131.
- 787 56. Nevado-Holgado AJ, Marten F, Richardson MP, Terry JR (2012) Characterising the dynamics of EEG waveforms as  
788 the path through parameter space of a neural mass model: Application to epilepsy seizure evolution. *Neuroimage*  
789 59(3):2374–2392.
- 790 57. Freestone DR, et al. (2014) Estimation of effective connectivity via data-driven neural modeling. *Front Neurosci* 8:1–20.
- 791 58. Jirsa VK, Stacey WC, Quilichini PP, Ivanov AI, Bernard C (2014) On the nature of seizure dynamics. *Brain* 137:2210–  
792 2230.
- 793 59. Wenzel M, Hamm JP, Peterka DS, Yuste R (2017) Reliable and elastic propagation of cortical seizures in vivo. *Cell Rep*  
794 19:2681–2693.
- 795 60. Wang Y, et al. (2017) Mechanisms underlying different onset patterns of focal seizures. *PLoS Comput Biol*  
796 13(5):e1005475.
- 797 61. Proix T, Jirsa VK, Bartolomei F, Guye M, Truccolo W (2018) Predicting the spatiotemporal diversity of seizure  
798 propagation and termination in human focal epilepsy. *Nat Commun* 9:1088.
- 799 62. Karoly PJ, et al. (2018) Circadian and circaseptan rhythms in human epilepsy: a retrospective cohort study. *Lancet Neurol*  
800 17:977–985.
- 801 63. Meisel C, Plenz D, Schulze-Bonhage A, Reichmann H (2016) Quantifying antiepileptic drug effects using intrinsic  
802 excitability measures. *Epilepsia* 57(11):e210–e215.
- 803 64. Badawy RAB, Macdonell RAL, Berkovic SF, Newton MR, Jackson GD (2010) Predicting seizure control: cortical  
804 excitability and antiepileptic medication. *Ann Neurol* 67(1):64–73.
- 805 65. Badawy RAB, Jackson GD, Berkovic SF, Macdonell RAL (2013) Cortical excitability and refractory epilepsy: a three-  
806 year longitudinal transcranial magnetic stimulation study. *Int J Neural Syst* 23(01):1250030.
- 807 66. Bardy AH (1992) Reduction of antiepileptic drug dosage for monitoring epileptic seizures. *Acta Neurol Scand* 86:466–  
808 469.
- 809 67. Ung H, et al. (2016) Temporal behavior of seizures and interictal bursts in prolonged intracranial recordings from  
810 epileptic canines. *Epilepsia* 57(12):1949–1957.
- 811 68. Baud MO, Vulliemoz S, Seeck M (2015) Recurrent secondary generalization in frontal lobe epilepsy: predictors and a  
812 potential link to surgical outcome? *Epilepsia* 56(9):1454–1462.
- 813 69. Goodfellow M, et al. (2016) Estimation of brain network ictogenicity predicts outcome from epilepsy surgery. *Sci Rep*  
814 6:29215.
- 815 70. Kini LG, et al. (2019) Virtual resection predicts surgical outcome for drug-resistant epilepsy. *Brain*:1–14.
- 816 71. Wagenaar JB, Brinkmann BH, Ives Z, Worrell GA, Litt B (2013) A multimodal platform for cloud-based collaborative  
817 research. *Int IEEE/EMBS Conf Neural Eng*:1386–1389.
- 818 72. Kini LG, Davis KA, Wagenaar JB (2016) Data integration: combined imaging and electrophysiology data in the cloud.  
819 *Neuroimage* 124:1175–1181.
- 820 73. Martinet L-E, et al. (2017) Human seizures couple across spatial scales through travelling wave dynamics. *Nat Commun*  
821 8:14896.
- 822 74. Lee DD, Seung HS (1999) Learning the parts of objects by non-negative matrix factorization. *Nature* 401:788–791.
- 823 75. Wu S, et al. (2016) Stability-driven nonnegative matrix factorization to interpret spatial gene expression and build local  
824 gene networks. *Proc Natl Acad Sci* 113(16):4290–4295.

- 825 76. Aggarwal CC, Hinneburg A, Keim DA (2001) On the surprising behavior of distance metrics in high dimensional space.  
826 *Database Theory – ICDT 2001*:420–434.
- 827 77. Tibshirani R, Walther G, Hastie T (2001) Estimating the number of clusters in a data set via the gap statistic. *J R Stat Soc*  
828 *Ser B (Statistical Methodol* 63:411–423.
- 829 78. Mantel N (1967) The detection of disease clustering and a generalized regression approach. *Cancer Res* 27(1):209–220.
- 830 79. Benjamini Y, Hochberg Y (1995) Controlling the false discovery rate: a practical and powerful approach to multiple  
831 testing. *J R Stat Soc Ser B* 57(1):289–300.
- 832 80. Kim J, He Y, Park H (2014) Algorithms for nonnegative matrix and tensor factorizations: a unified view based on block  
833 coordinate descent framework. *J Glob Optim* 58:285–319.
- 834 81. Kim J, Park H (2011) Fast nonnegative matrix factorization: an active-set-like method and comparisons. *SIAM J Sci*  
835 *Comput* 33(6):3261–3281.
- 836

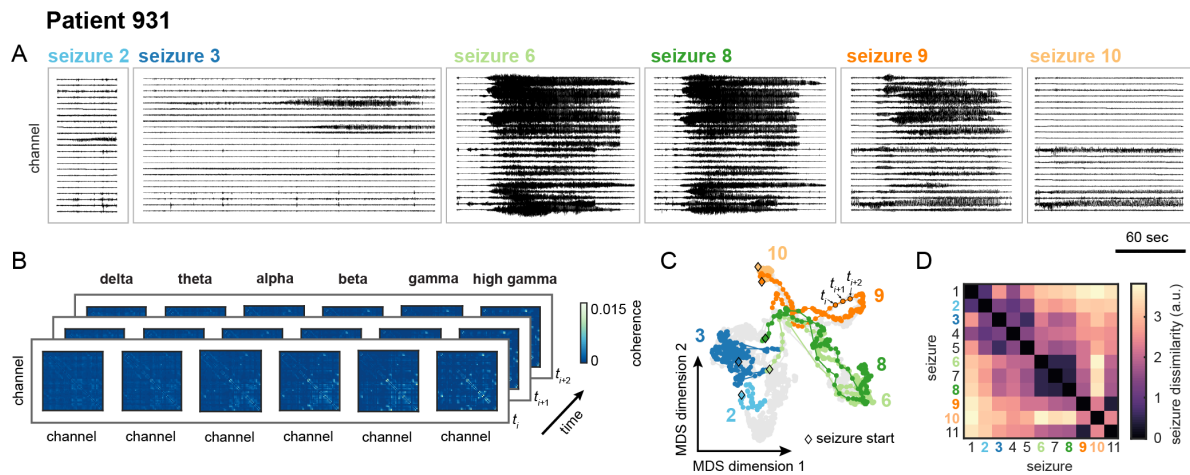

837  
838  
839  
840  
841  
842  
843  
844  
845  
846  
847  
848  
849  
850  
851  
852  
853  
854

**Fig. 1: Visualising and comparing seizure pathways through network space in an example patient, patient 931.** A) Intracranial EEG traces of a subset of the patient's seizures. For clarity, only a representative subset of the recording channels are shown. B) Functional connectivity of three example seizure time windows. Functional connectivity was defined as band-averaged coherence in each of six different frequency bands. Each matrix was normalised so that the upper triangular elements summed to one. Self connections are not shown in order to focus on inter-channel connectivity. C) Projection of all seizure time windows into a two dimensional space using multidimensional scaling (MDS), allowing visualisation of seizure pathways through network space. Each point corresponds to a seizure time window, and time windows with more similar network dynamics are placed closer together in the projection. Consecutive time windows in the same seizure are connected to visualise seizure pathways. The time windows and pathways of the six seizures shown in Fig. 1A have been highlighted using the corresponding colours, and the time windows of the remaining seizures are shown in grey for reference. The first time windows of the selected seizures are each marked with a diamond. D) Seizure dissimilarity matrix of all of the patient's seizures, which quantifies the difference in the network dynamics of each pair of seizures. A low dissimilarity indicates that the two seizures have similar pathways through network space.

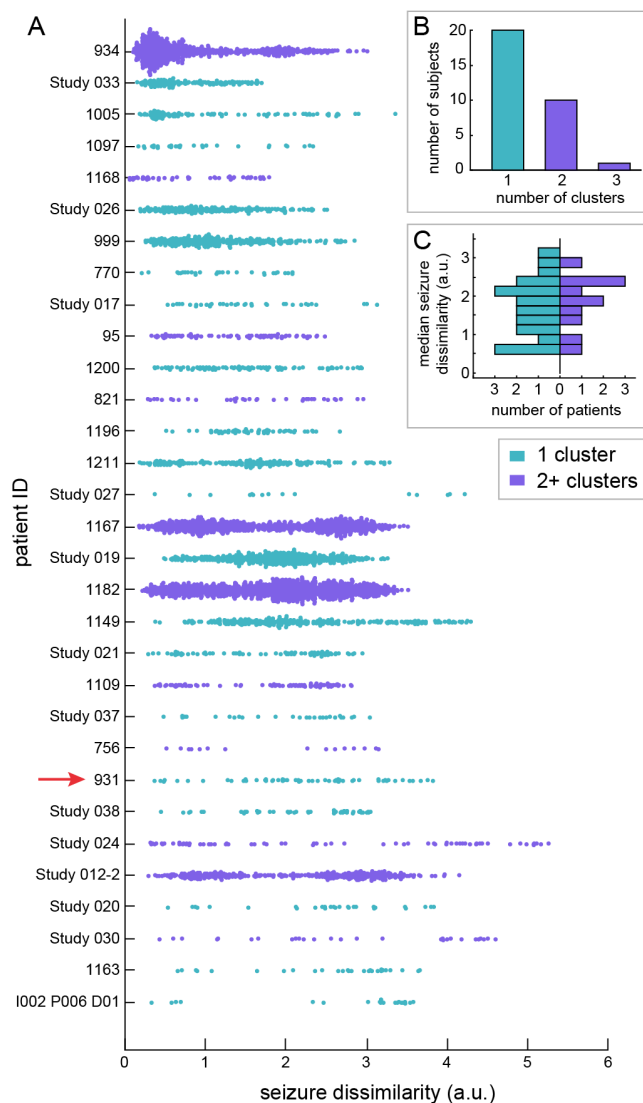

855

856

857 **Fig. 2: Variability in seizure pathways is common in all patients, but may take the form**

858 **of either a spectrum or clusters of seizure dynamics.** A) Distributions of seizure

859 dissimilarities in each patient. Patients are sorted from lowest median seizure dissimilarity

860 (patient 934) to highest median seizure dissimilarity (I002 P006 D01). The red arrow indicates

861 patient 931, the example patient from Figure 1. In each distribution, each point corresponds to

862 the dissimilarity of a pair of seizures. The distribution is coloured based on the number of

863 seizure clusters, computed using seizure dissimilarities, in each patient. B) The number of

864 patients with different numbers of seizure clusters based on seizure dissimilarities. The majority

865 of patients had one seizure cluster. C) Distribution of median seizure dissimilarities in patients

866 with one (left, teal) or multiple (right, purple) seizure cluster.

867

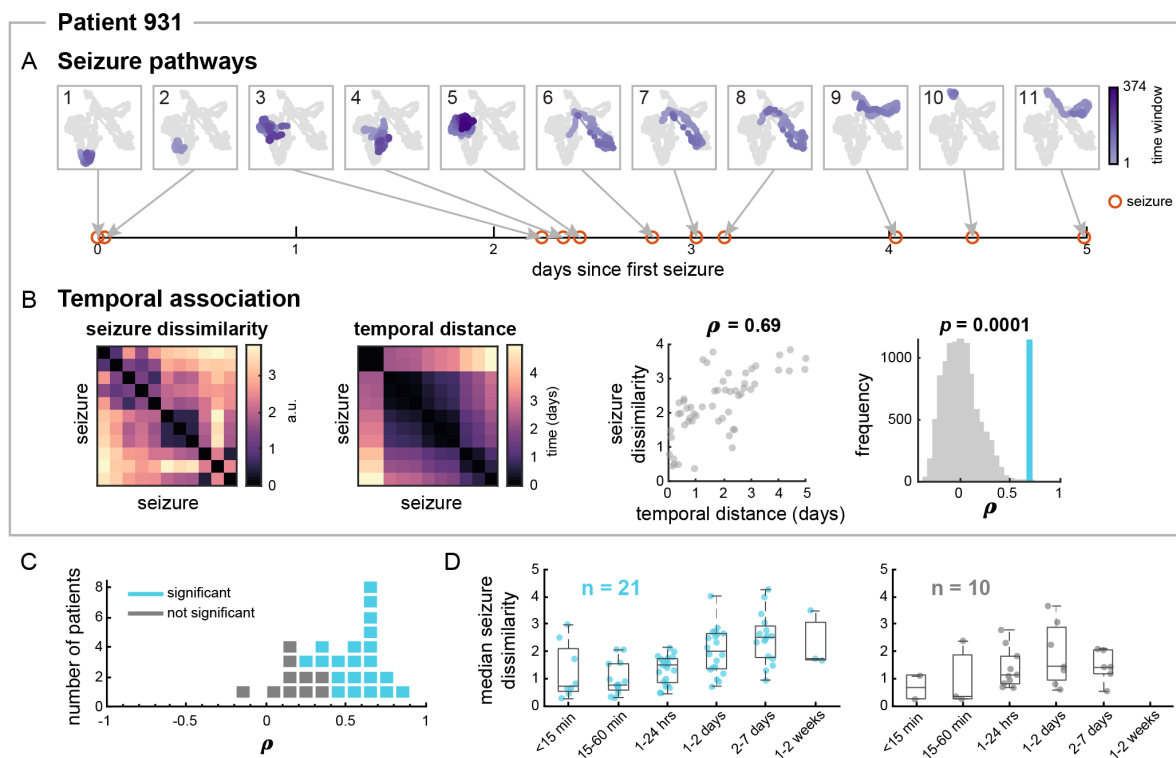

868  
869

870 **Fig. 3: More similar seizures tend to occur closer together in time in most patients.** A)

871 MDS projections of all of patient 931's seizure pathways, numbered from first to last seizure. The

872 pathway of each seizure is shown in purple, with earlier time windows in lighter purple. The time

873 windows and pathways of the remaining seizures are shown in grey for comparison. Below the

874 pathways, the time of each seizure (red circles) relative to the first seizure is shown. Note that

875 seizures with more similar pathways tend to occur close together in time. B) From left to right:

876 patient 931's seizure dissimilarity matrix, temporal distance matrix, and comparison of seizure

877 dissimilarities and temporal distances. The temporal distance matrix quantifies the amount of time

878 between each pair of seizures, in days. Plotting the seizure dissimilarity vs. the corresponding

879 temporal distance of each pair of seizures (scatter plot, second from right) reveals a positive

880 Spearman's correlation  $\rho$  between the two features. The significance of this correlation can be

881 tested using permutation testing (distribution, far right). The distribution of the 10,000 correlations

882 computed from permuted matrices is shown in grey, and the observed correlation is marked with

883 the vertical blue line. The  $p$ -value of the association was equal to the proportion of times a

884 correlation value greater than or equal to the observed correlation was seen in the distribution. C)

885 Dot plot showing the range of correlations between seizure dissimilarities and temporal distances

886 across all subjects. Each marker represents a patient (blue = significant correlation, grey = not

887 significant after false discovery rate correction). D) Median seizure dissimilarities of pairs of

888 seizures occurring within different time intervals (i.e., temporal distances) for patient with (left,

889 blue) and without (right, grey) a significant correlation between seizure dissimilarities and temporal  
890 distances. Each point corresponds to the median dissimilarity of pairs of seizures occurring within  
891 the given time interval in a single patient. Note that some time intervals have fewer observations  
892 since some temporal distances were not observed in some subjects. The boxplots indicate the  
893 minimum, lower quartile, median, upper quartile, and maximum of the distribution of median  
894 seizure dissimilarities, across the subset of subjects, for that time interval.  
895

896

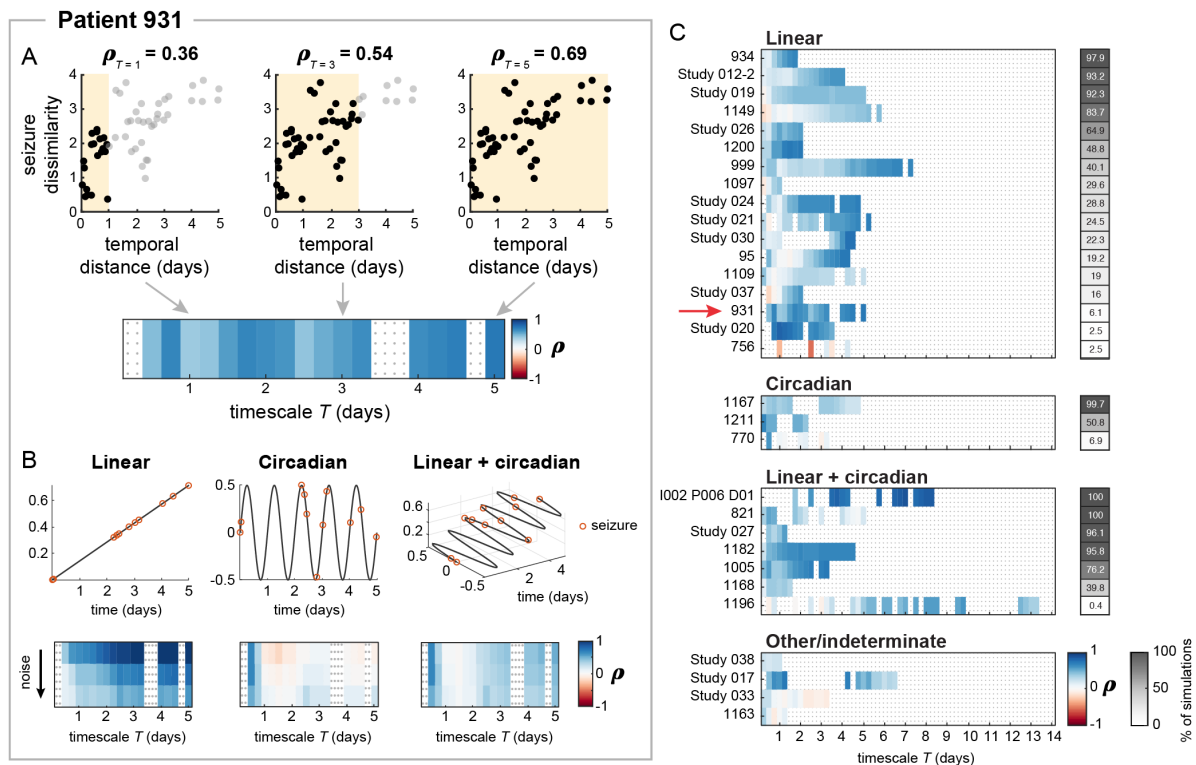

897  
898

899 **Fig. 4: Temporal patterns of changes in seizure dynamics.** A) For patient 931, the correlation  
900 between seizure dissimilarities and temporal distances was computed for seizure pairs within  
901 different timescales, producing a heatmap of the “temporal patterns” of seizure dynamics  
902 (bottom). The seizure pairs used to compute the correlation for three example timescales ( $T = 1$   
903 day,  $T = 3$  days, and  $T = 5$  days) are shown in the top scatter plots (reproduced from Fig. 3B).  
904 Purple shading indicates the timescale used for each computation (e.g., seizure pairs occurring  
905 within 0 – 1 days for  $T = 1$  day), black points correspond seizure pairs used to compute the  
906 correlation for that timescale, and grey points correspond to seizure pairs occurring further apart  
907 than the given timescale. The correlation between seizure dissimilarities and temporal distances at  
908 the given timescale is shown above each scatter plot. At  $T = 5$  days, all seizure pairs are included  
909 in the computation, producing the same temporal correlation as in Fig. 3B. If there were less than  
910 seven seizure pairs occurring within a given timescale, or if no new seizure pairs were added when  
911 the timescale was extended, the correlation for that timescale was excluded from the heatmap and  
912 downstream analysis (regions with grey dots). B) Seizure dissimilarities were modelled based on  
913 linear (left), circadian (middle) or a combination of linear + circadian (right) changes in seizure  
914 dynamics. The timepoints of patient 931’s seizures are shown in red on each function. From each  
915 model, the temporal pattern of seizure changes was then derived (heatmaps, bottom row),  
916 revealing the expected temporal associations between seizures on different timescales given the  
917 simulated changes in dynamics. The temporal pattern also depended on the amount of noise

918 included in the simulation; for clarity and brevity, different levels of a single noise realisation are  
919 shown, with the amount of noise increasing from the top to bottom row of each set of heatmaps.  
920 C) Temporal patterns of seizure dynamics in each patient, sorted by the type of model that most  
921 closely matched the observed temporal patterns. The heatmap on the right (grey) shows the  
922 percentage of noisy simulations of the selected parameter set that closely matched the observed  
923 dynamics. Patient 931 is indicated with a red arrow.
